# Supplementary material for: Improvement of d–d interactions in density functional tight binding for transition metal ions with a ligand field model: assessment of a DFTB3+U model on nickel coordination compounds
Source: Royal Society of Chemistry journal article supplement (doi:10.1039/d0cp04694a), 2020-01-01
Supplement: d0cp04694a1.pdf [file d0cp04694a1.pdf]

In ligand-field theory the energy of all the states arising from a particular electron configuration can be written as a linear combination of the Slater integrals  $F^k$ ,

$$E = \sum_{k=0}^{2l} C_k F^k$$

It can be shown<sup>1,2</sup> that all multiplet states arising from the same electron configuration have the same dependency on  $C_0$ , i.e.  $C_0$  is a fixed number for that particular configuration. A well-known consequence of this property of ligand-field theory is that excitations within a configuration do not depend on  $F^0$ . However, on our simulations the high-spin to low-spin excitation is seen (Figure 1 in the main text) to depend on  $F^0$ . As explained in the main text this difference comes from the use, in our DFT-based calculation, of a single Slater determinant (with fractional occupations and spin contamination) to represent the atomic state when compared to the multideterminant representation (with states with well-defined  $\langle S^2 \rangle$  values) used in ligand-field theory.

In order to show this, we use Eq. 8 in the main text to calculate the 4-center intra-atomic integrals setting  $F^2=F^4=0$ . We can observe that the only non-zero integrals are:

$$\left\langle \chi_0 \chi_0 \left| \frac{1}{|r-r'|} \right| \chi_0 \chi_0 \right\rangle = \left\langle \chi_0 \chi_1 \left| \frac{1}{|r-r'|} \right| \chi_0 \chi_1 \right\rangle = F^0$$

From these integrals we can now use Eq. 7 to evaluate the energy of the different configurations used. A summary of these calculations can be found on the following table. We can see that the energy of the different atomic configurations has a different dependency on  $F^0$ . Moreover, the high-spin low-spin energy difference in a  $d^8$  system ( $\text{Ni}^{2+}$ ) is  $0.6F^0$  while in a  $d^7$  system ( $\text{Ni}^{3+}$ ) is  $1.2F^0$ , thus explaining how the slope in Figure 1 in the main text is double for  $\text{Ni}^{3+}$  than for  $\text{Ni}^{2+}$ .

**Table** Energies of the d-shell in terms of  $F^0$ , associated to different electronic configurations for in d-shell electronic occupation and spin and the orbital occupation associated to that state assuming a single Slater determinant representation.

| Electronic configuration | Spin      | Occupation per d orbital           | State energy |
|--------------------------|-----------|------------------------------------|--------------|
| $d^7$                    | High-spin | (1.0 $\uparrow$ 0.4 $\downarrow$ ) | $33.2F^0$    |
| $d^7$                    | Low-spin  | (0.8 $\uparrow$ 0.6 $\downarrow$ ) | $32.0F^0$    |
| $d^8$                    | High-spin | (1.0 $\uparrow$ 0.6 $\downarrow$ ) | $42.2F^0$    |
| $d^8$                    | Low-spin  | (0.8 $\uparrow$ 0.8 $\downarrow$ ) | $41.6F^0$    |

## References:

1. Bersuker, I. B. *Electronic Structure and Properties of Transition Metal Compounds: Introduction to the Theory*; Wiley, 2010.
2. Griffith, J. S. *The Theory of Transition-Metal Ions*; Cambridge University Press, 1964
