# Supplementary material for: Improvement of d–d interactions in density functional tight binding for transition metal ions with a ligand field model: assessment of a DFTB3+U model on nickel coordination compounds
Source: Royal Society of Chemistry journal article supplement (doi:10.1039/d0cp04694a), 2020-01-01
Supplement: d0cp04694a2.xlsx [file d0cp04694a2.xlsx]

## Sheet: S1
					Table S1 dn configuration and number of unpaired electrons											in d-shell of Ni(II)/Ni(III) complexes obtained by Mulliken population										analysis,		for DFTB3 and DFTB+U(F0=0.035 ).
					Ni(II)																			Ni(III)
					# of unpaired electrones in d orbitals						# of electrones in d orbitals													# of unpaired electrones in d orbitals						# of electrones in d orbitals
					Low spin (S=0)		High spin (S=1)				Low spin (S=0)		High spin (S=1)											Low spin (S=1/2)		High spin (S=3/2)				Low spin (S=1/2)		High spin (S=3/2)
					DFTB3	DFTB3+F0=0.03	DFTB3	DFTB3+F0=0.035			DFTB3	DFTB3+F0=0.03	DFTB3	DFTB3+F0=0.035										DFTB3	DFTB3+F0=0.03	DFTB3	DFTB3+F0=0.03			DFTB3	DFTB3+F0=0.03	DFTB3	DFTB3+F0=0.03
			[Ni(AcO)]+				1.23153	1.78756			8.85105	7.99315	8.70864	7.86481								[Ni(AcO)]2+		0.626648	0.947529	1.49635	2.28028			8.49575	7.72085	8.46795	7.62378
			[Ni(CN)]+				1.13021	1.7275			8.90477	7.97748	8.74503	7.88598								[Ni(CN)]2+		0.784357		1.49583				8.53003		8.42565
			[Ni(CN)2]				0.941465	1.76142			9.08414	8.02398	8.84164	7.71479								[Ni(CN)2]+		0.228774	0.7584	1.20894	2.12552			8.78443	7.64067	8.63093	7.55738
			[Ni(CN)3]−				0.760054	1.48287			9.02251	7.86831	8.96458	7.65194								[Ni(CN)3]		0.219728	0.903545	1.21054	2.14407			8.86723	7.62001	8.57288	7.39056
			[Ni(CN)4]2−				0.846663	1.43726			9.08	7.80426	8.88531	7.53098								[Ni(CN)4]−		0.331283	0.833698	1.17795	2.03659			8.75296	7.52699	8.56294	7.31219
			[Ni(CO3)]				0.970956	1.64003			8.98914	7.92829	8.93149	7.75901								[Ni(CO3)]+		0.30913		1.30669				8.69757		8.62889
			[Ni(CS)]2+				1.36161	1.78881			8.68793	7.99927	8.53574	7.87614								[Ni(CS)]3+		1.07585	0.972761	1.70877				8.63489	8.02069	8.26633
			[Ni(CS)2]2+				1.09492	1.71841			8.80375	7.85529	8.69371	7.72413								[Ni(CS)3]3+		0.214378	0.805516	1.06763	2.01552			8.79633	7.64846	8.70813	7.4991
			[Ni(CS)3]2+				0.828686	1.40194			8.87624	7.76569	8.83573	7.60223								[Ni(CS)4]3+		0.266408	0.639058	0.895013	1.73133			8.79116	7.5678	8.77862	7.42374
			[Ni(CS)4]2+								8.94631	7.67732										[Ni(en)]3+		0.476425	0.859096	1.4557				8.67525	7.82335	8.50736
			[Ni(en)]2+				1.23952	1.81542			8.88094	8.09448	8.70182	7.95223								[Ni(en)2]3+		0.0525082	0.997721	0.915279	2.30232			9.10341	7.6691	9.01709	7.53055
			[Ni(en)2]2+				0.850553	1.64652			9.15467	8.19032	9.06359	7.94244								[Ni(form.)2]3+		0.878483	0.827195	1.32225				8.6257	7.74645	8.60329
			[Ni(form.)]2+				1.37349	1.82458			8.65484	8.02569	8.56264	7.92256								[Ni(form.)3]3+		0.309684	0.901775	1.18316				8.76365	7.62265	8.71462
			[Ni(form.)2]2+				1.08544	1.68488			8.75004	7.72993	8.68822	7.74856								[Ni(form.)4]3+		0.123194	0.951404	1.16474	2.30048			8.80785	7.55093	8.73288	7.48934
			[Ni(form.)3]2+				1.08546	1.76025			8.82996	7.84574	8.74256	7.71237								[Ni(NC)]2+		1.08269	1.10018	1.60843				8.42417	7.8338	8.33952
			[Ni(form.)4]2+				1.08548				8.80869	7.77239	8.77923									[Ni(NC)2]+		0.456376	0.832141	1.2592	2.1293			8.60374	7.65696	8.51723	7.473
			[Ni(NC)]+				1.17437	1.7507			8.81992	7.90632	8.69878	7.85392								[Ni(NC)3]		0.398728	0.758051	1.37329	2.22561			8.53482	7.4951	8.4054	7.33633
			[Ni(NC)2]				1.04076	1.77498			8.76117	7.67167	8.67954	7.63872								[Ni(NC)4]−		0.433434	0.906896	1.45843	2.19576			8.48537	7.45861	8.31588	7.26965
			[Ni(NC)3]−				1.05516	1.56378			8.78591	7.7966	8.69031	7.66349								[Ni(NCS)]2+		1.00381		1.29558				8.60402		8.59372
			[Ni(NC)4]2−				1.18942	1.60925			8.80486	7.7864	8.59943	7.57789								[Ni(NCS)2]+		0.333589	0.691496	0.831329				8.82622	7.57316	8.835
			[Ni(NCS)]+				0.908829	1.59158			8.91781	7.89326	8.89732	7.87259								[Ni(H2O)(NH3)2]3+		0.673755	0.947955	1.45505	2.38493			8.55395	7.62878	8.48489	7.47176
			[Ni(NCS)2]				0.475098	1.5961			9.13324	7.71528	9.13738	7.6702								[Ni(H2O)(SH2)2]3+		0.674585	0.929839	1.25948	2.20681			8.75974	7.71409	8.69931	7.6913
			[Ni(H2O)(NH3)]2+				1.37505	1.80402			8.65865	7.82635	8.5076	7.80559								[Ni(H2O)2(NH3)2]3+-cis		0.501796	0.945308	1.43525	2.39492			8.58284	7.59116	8.50448	7.45032
			[Ni(H2O)(NH3)2]2+				1.25527	1.80972			8.84253	8.03121	8.66498	7.91298								[Ni(H2O)2(NH3)2]3+-trans		0.552394	0.984537	1.43554	2.39377			8.58008	7.60633	8.50413	7.45047
			[Ni(H2O)(SH2)]2+				1.23509	1.8001			8.75852	7.90785	8.64965	7.8244								[Ni(NH3)(SH2)2]3+		0.332663	1.00721	1.08528	2.18034			8.94051	7.78203	8.84801	7.66563
			[Ni(H2O)(SH2)2]2+				1.02688	1.76633			9.01405	7.99807	8.86568	7.89388								[Ni(NH3)3(SH2)]3+		0.306805	1.01838	1.07365	2.27795			8.88993	7.68403	8.85831	7.55564
			[Ni(H2O)2(NH3)]2+				1.35234	1.8243			8.75266	8.0057	8.56495	7.87882								[Ni(CH3)2]+		0.556925	1.03963	1.14764	2.22944			8.95133	7.84994	8.743	7.53977
			[Ni(H2O)2(NH3)2]2+-cis				1.27212	1.78896			8.89126	8.09394	8.66588	7.95732								[Ni(CO)3]3+		0.561293	0.999683	1.37333	2.28885			8.63206	7.71297	8.56906	7.57144
			[Ni(H2O)2(NH3)2]2+-trans				1.27208	1.7886			8.89895	8.10452	8.6659	7.95717								[Ni(CO)4]3+		0.46184	0.983398	1.20154	2.20281			8.73817	7.6986	8.70552	7.55977
			[Ni(H2O)2(SH2)]2+				1.24419	1.80888			8.82474	7.99292	8.6606	7.87079								[Ni(CO)5]3+		0.355171	0.811081	1.1671	2.28735			8.84889	7.68001	8.77096	7.56344
			[Ni(NH3)(SH2)]2+				1.15067	1.81226			8.84759	7.94099	8.75043	7.87164								[Ni(CO)6]3+		0.363959	0.686095	1.07922	2.29492			8.89768	7.78317	8.87266	7.60379
			[Ni(NH3)(SH2)2]2+				0.891077	1.73937			9.08713	8.0861	9.00446	7.93267								[Ni(H2O)2]3+		0.420828	0.801322	1.69236	2.40151			8.36021	7.62527	8.26515	7.47432
			[Ni(NH3)2(SH2)]2+				1.11584	1.58387			9.0099	8.08069	8.72557	7.8795								[Ni(H2O)3]3+		0.596238	0.795205	1.62663	2.44011			8.3724	7.52983	8.30944	7.41206
			[Ni(NH3)3(SH2)]2+				0.935106	1.67055			9.12366	8.13942	8.96942	7.9242								[Ni(H2O)4]3+		0.531619	0.93265	1.65773	2.47559			8.39056	7.51422	8.28297	7.37842
			[Ni(CH3)]+				1.14128	1.85389			9.11779	7.9146	8.77672	7.8594								[Ni(H2O)5]3+		0.554233	0.846594	1.71794	2.53677			8.40926	7.53938	8.25159	7.37722
			[Ni(CH3)2]				0.832397	1.86368			9.39908	8.04501	9.0088	7.7305								[Ni(H2O)6]3+		0.569311	0.819489	1.84075	2.60658			8.38126	7.5675	8.15502	7.38546
			[Ni(CO)]2+				1.56588	1.86211			8.55305	8.04923	8.38895	7.93308								[Ni(NH2)]2+		0.366921	0.794248	1.57357	2.13625			8.51293	7.80577	8.38591	7.72757
			[Ni(CO)2]2+				1.38264	1.75573			8.71469	8.00976	8.51307	7.8516								[Ni(NH2)2]+		0.477171	0.878767	1.05594	2.18859			8.69273	7.47977	8.70845	7.41614
			[Ni(CO)3]2+				1.20983	1.66765			8.8888	7.98976	8.65722	7.82335								[Ni(NH3)(NH2)]2+		0.637032	0.881493	1.34701	2.16282			8.60209	7.69137	8.56865	7.62388
			[Ni(CO)4]2+				0.983556	1.48081			8.99162	7.9733	8.82469	7.77002								[Ni(NH3)2(NH2)]2+		0.1976	0.716949	1.33137	2.19755			8.75634	7.72627	8.57317	7.54966
			[Ni(CO)5]2+				0.926919	1.55369			9.00526	7.77205	8.93397	7.86478								[Ni(NH3)3]3+		0.545666	1.00141	1.35538	2.36727			8.6515	7.66191	8.58542	7.49433
			[Ni(CO)6]2+				0.829177	1.63472			9.13561	7.98481	9.07956	7.95522								[Ni(NH3)4]3+		0.577332	1.00954	1.21333	2.3485			8.65294	7.6464	8.72438	7.4945
			[Ni(H2O)]2+				1.58892	1.87051			8.43488	8.02372	8.3724	7.9185								[Ni(NH3)5]3+		0.395155	0.807966	1.25292	2.41843			8.84105	7.6927	8.71272	7.49646
			[Ni(H2O)2]2+				1.38634	1.77618			8.54442	7.76418	8.47116	7.77801								[Ni(NH3)6]3+		0.305473	0.745637	1.29676	2.45887			8.91688	7.73068	8.69147	7.5174
			[Ni(H2O)3]2+				1.4233	1.84737			8.62774	7.94238	8.48804	7.85088								[Ni(OH)]2+		0.32108	0.740445	1.64939	2.21684			8.36644	7.73576	8.31448	7.67052
			[Ni(H2O)4]2+				1.46406	1.76542			8.66951	7.99806	8.47145	7.87668								[Ni(OH)(H2O)]2+		0.334422	0.737765	1.50943	2.1345			8.37637	7.50518	8.32897	7.49668
			[Ni(H2O)5]2+				1.49667	1.82873			8.6114	7.96075	8.4693	7.94547								[Ni(OH)(H2O)2]2+		0.378658	0.786313	1.55969	2.32187			8.44551	7.55969	8.33147	7.44364
			[Ni(H2O)6]2+				1.49795	1.85385			8.59912	8.11124	8.49614	8.08419								[Ni(OH)(H2O)3]2+		0.361971	0.831282	1.58099	2.36957			8.48014	7.55626	8.33695	7.43635
			[Ni(NH2)]+				1.02213	1.75961			8.86042	7.84544	8.84127	7.80798								[Ni(OH)2]+		0.544432	0.793507	1.46501	2.21728			8.42935	7.3965	8.28648	7.34083
			[Ni(NH2)2]				0.269407	1.83715			9.19082	7.73464	9.44146	7.60809								[Ni(OH)3]		0.500619	0.889429	1.60112	2.45682			8.40237	7.41557	8.24881	7.24797
			[Ni(NH3)]2+				1.53509	1.85373			8.61589	8.07279	8.42741	7.94125								[Ni(OH)4]−		0.678633	0.978087	1.9668	2.5917			8.16876	7.32622	7.95037	7.20166
			[Ni(NH3)(NH2)]+				0.897575	1.78416			8.91988	7.81127	8.87797	7.73584								[Ni(PH2)]2+		0.949867		1.3324	2.00709			8.75011		8.63729	7.87865
			[Ni(NH3)2]2+				1.29123	1.83777			8.73752	7.92788	8.62405	7.86928								[Ni(PH2)2]+		0.280758	0.885543	0.745461				9.23495	7.99477	9.0972
			[Ni(NH3)2(NH2)]+				0.729301	1.65447			9.11916	8.07244	9.12525	7.83192								[Ni(PH2)3]		0.045772	0.820471	0.0890283	2.02911			9.64886	7.77964	9.75688	7.52268
			[Ni(NH3)3]2+				1.1413	1.7903			8.91453	8.06708	8.77862	7.94057								[Ni(PH3)(PH2)]2+		0.371422	0.802565	0.945038	1.9771			9.04798	8.00366	8.96249	7.77162
			[Ni(NH3)4]2+				1.07213	1.69647			9.06959	8.17364	8.85406	7.95628								[Ni(PH3)2(PH2)]2+		0.128818	0.724081	0.671855	1.91842			9.27658	7.94192	9.21378	7.76822
			[Ni(NH3)5]2+				1.02049	1.75328			9.07426	8.125	8.94244	8.05952								[Ni(PH3)3]3+		0.116377	1.04856	0.869561	2.15967			9.28028	7.8481	9.06886	7.68918
			[Ni(NH3)6]2+				0.875744	1.78274			9.25175	8.20314	9.11484	8.18101								[Ni(PH3)4]3+		-0.00982683	1.03964	0.363664	2.07915			9.51036	7.82383	9.54342	7.66438
			[Ni(OH)]+				1.16784	1.80968			8.73651	7.79085	8.7067	7.76972								[Ni(PH3)5]3+		0.0832413	0.734232	0.203002	2.11195			9.54968	7.85651	9.72923	7.67243
			[Ni(OH)(H2O)]+				1.09772	1.81827			8.69665	7.70012	8.66526	7.66408								[Ni(SH)]3+		0.70345		1.36528				8.67467		8.60504
			[Ni(OH)(H2O)2]+				1.1201	1.78206			8.74565	7.7801	8.68686	7.70648								[Ni(SH)2]+		0.275463	0.990205	0.82078	2.12793			9.00792	7.64385	9.01448	7.57014
			[Ni(OH)(H2O)3]+				1.17597	1.77272			8.8319	8.00638	8.69656	7.77124								[Ni(SH2)(SH)]2+		0.249697	0.678572	1.0831	2.04766			8.90202	7.89752	8.83579	7.7548
			[Ni(OH)2]				1.097	1.85413			8.7513	7.63422	8.59605	7.56785								[Ni(SH2)2]3+		0.82128	1.08147	1.22322				8.73984	7.83669	8.73922
			[Ni(OH)3]−				1.17079	1.81384			8.79547	7.71926	8.6611	7.67592								[Ni(SH2)2(SH)]2+		0.141102	0.696195	0.787916	2.05034			9.09985	7.83095	9.09599	7.68722
			[Ni(OH)4]2−				1.58033	1.9837			8.67849	7.73981	8.31147	7.51859								[Ni(SH2)3]3+		0.259624	0.999644	0.946594	2.16516			9.07102	7.78801	8.98549	7.67702
			[Ni(PH2)]+				0.893163	1.75386			9.16863	8.03124	9.00574	7.93741								[Ni(SH2)4]3+		0.164314	0.879722	0.614312	2.11617			9.2632	7.83699	9.30003	7.67155
			[Ni(PH2)2]				0.0954774	1.74129			9.5622	8.07638	9.73199	7.79728								[Ni(SH2)5]3+		0.107712	0.769751	0.427363	2.15683			9.40022	7.83582	9.503	7.66583
			[Ni(PH2)3]−				0.0260508	1.69293			9.78939	7.85377	9.88091	7.70402								[Ni(SH2)6]3+		0.0937084	0.656256	0.249071	2.19567			9.46236	7.84965	9.70431	7.6669
			[Ni(PH3)]2+				1.31726	1.87629			8.82633	8.07832	8.6469	7.96346								[Ni(SH)3]		0.271141	0.736018	0.805394	2.148			8.93378	7.60295	9.00341	7.46161
			[Ni(PH3)(PH2)]+				0.705702	1.6168			9.37471	8.13402	9.12803	7.90252								AVERAGE		0.424565	0.865166	1.20269	2.22748			8.77163	7.68725	8.69554	7.53221
			[Ni(SH)2]				0.123987	1.83371			9.39711	7.78741	9.66135	7.70679
			[Ni(SH2)]2+				1.36042	1.88394			8.71916	8.06286	8.60212	7.9607
			[Ni(SH2)(SH)]+				0.787729	1.74451			9.14288	8.01049	9.0409	7.82951
			[Ni(SH2)2]2+				1.03532	1.80584			8.96359	7.94802	8.86237	7.88168
			[Ni(SH2)2(SH)]+				0.490176	1.57885			9.29019	7.96343	9.3394	7.89795
			[Ni(SH2)3]2+				0.772225	1.72236			9.1837	8.02508	9.11259	7.93298
			[Ni(SH2)4]2+				0.551813	1.65348			9.30775	8.11152	9.33293	7.92231
			[Ni(SH2)5]2+				0.428814	1.66326			9.48397	8.02545	9.48724	7.98089
			[Ni(SH2)6]2+				0.284325	1.66695			9.63768	8.05589	9.65825	8.02317
			[Ni(SH)3]−				0.420002	1.73003			9.08551	7.80364	9.39986	7.70053
			AVERAGE				1.0271	1.74004			8.94341	7.94299	8.83888	7.83157

## Sheet: S2
					Table S2 dn configuration and number of unpaired										electrons				in d-shell of Ni(II)/Ni(III) complexes obtained by Mulliken population										analysis,		for DFTB3 and DFTB+U(F0=0.035 ).
					Ni(II)																			Ni(III)
					# of unpaired electrones in d orbitals						# of electrones in d orbitals													# of unpaired electrones in d orbitals						# of electrones in d orbitals
					Low spin (S=0)		High spin (S=1)				Low spin (S=0)		High spin (S=1)											Low spin (S=1/2)		High spin (S=3/2)				Low spin (S=1/2)		High spin (S=3/2)
					DFTB3	GFN2-xTB	DFTB3	GFN2-xTB			DFTB3	GFN2-xTB	DFTB3	GFN2-xTB										DFTB3	GFN2-xTB	DFTB3	GFN2-xTB			DFTB3	GFN2-xTB	DFTB3	GFN2-xTB
			[Ni(AcO)]+				1.23153	1.468			8.85105	8.582	8.70864	8.498								[Ni(AcO)]2+		0.626648	0.692	1.49635	1.94			8.49575	8.053	8.46795	8.031
			[Ni(CN)]+				1.13021	1.427			8.90477	8.655	8.74503	8.452								[Ni(CN)]2+		0.784357	1	1.49583	2.169			8.53003	7.962		7.738
			[Ni(CN)2]				0.941465	1.081			9.08414	8.856	8.84164	8.744								[Ni(CN)2]+		0.228774	0.309	1.20894	1.621			8.78443	8.433	8.63093	8.236
			[Ni(CN)3]−				0.760054	0.959			9.02251	8.886	8.96458	8.763								[Ni(CN)3]		0.219728	0.499	1.21054	1.336			8.86723	8.572	8.57288	8.452
			[Ni(CN)4]2−				0.846663	0.993			9.08	8.973	8.88531	8.708								[Ni(CN)4]−		0.331283	0.511	1.17795	1.192			8.75296	8.609	8.56294	8.501
			[Ni(CO3)]				0.970956	1.274			8.98914	8.753	8.93149	8.681								[Ni(CO3)]+		0.30913	0.564	1.30669	1.774			8.69757	8.242		8.189
			[Ni(CS)]2+				1.36161	1.673			8.68793	8.338	8.53574	8.209								[Ni(CS)]3+		1.07585	0.687	1.70877	2.154			8.63489	7.791		7.811
			[Ni(CS)2]2+				1.09492	1.676			8.80375	8.404	8.69371	8.203								[Ni(CS)3]3+		0.214378	0.843	1.06763	1.721			8.79633	8.133	8.70813	8.108
			[Ni(CS)3]2+				0.828686	1.407			8.87624	8.52	8.83573	8.316								[Ni(CS)4]3+		0.266408	0.576	0.895013	1.481			8.79116	8.275	8.77862	8.194
			[Ni(CS)4]2+					1.072			8.94631	8.589		8.392								[Ni(en)]3+		0.476425	0.423	1.4557	1.619			8.67525	8.387		8.364
			[Ni(en)]2+				1.23952	1.332			8.88094	8.672	8.70182	8.644								[Ni(en)2]3+		0.0525082	0.47	0.915279	1.386			9.10341	8.579	9.01709	8.588
			[Ni(en)2]2+				0.850553	1.252			9.15467	8.831	9.06359	8.722								[Ni(form.)2]3+		0.878483	0.901	1.32225	1.639			8.6257	8.271		8.288
			[Ni(form.)]2+				1.37349	1.497			8.65484	8.486	8.56264	8.397								[Ni(form.)3]3+		0.309684	0.534	1.18316	1.49			8.76365	8.356		8.397
			[Ni(form.)2]2+				1.08544	1.322			8.75004	8.516	8.68822	8.482								[Ni(form.)4]3+		0.123194	0.486	1.16474	1.47			8.80785	8.337	8.73288	8.386
			[Ni(form.)3]2+				1.08546	1.275			8.82996	8.572	8.74256	8.511								[Ni(NC)]2+		1.08269	1	1.60843	2.04			8.42417	8.072	8.33952	7.898
			[Ni(form.)4]2+				1.08548	1.297			8.80869	8.553	8.77923	8.525								[Ni(NC)2]+		0.456376	0.464	1.2592	1.522			8.60374	8.43	8.51723	8.338
			[Ni(NC)]+				1.17437	1.384			8.81992	8.688	8.69878	8.513								[Ni(NC)3]		0.398728	0.393	1.37329	1.371			8.53482	8.462	8.4054	8.456
			[Ni(NC)2]				1.04076	1.109			8.76117	8.809	8.67954	8.731								[Ni(NC)4]−		0.433434	0.654	1.45843	1.395			8.48537	8.448	8.31588	8.408
			[Ni(NC)3]−				1.05516	1.101			8.78591	8.773	8.69031	8.714								[Ni(NCS)]2+		1.00381	0.517	1.29558	1.448				8.453		8.448
			[Ni(NC)4]2−				1.18942	1.197			8.80486	8.824	8.59943	8.648								[Ni(NCS)2]+		0.333589	0.468	0.831329	1.276			8.82622	8.541		8.565
			[Ni(NCS)]+				0.908829	1.069			8.91781	8.797	8.89732	8.799								[Ni(H2O)(NH3)2]3+		0.673755	0.895	1.45505	1.946			8.55395	8.053	8.48489	8.028
			[Ni(NCS)2]				0.475098	1.057			9.13324	8.756	9.13738	8.759								[Ni(H2O)(SH2)2]3+		0.674585	0.853	1.25948	1.436			8.75974	8.594	8.69931	8.53
			[Ni(H2O)(NH3)]2+				1.37505	1.651			8.65865	8.409	8.5076	8.292								[Ni(H2O)2(NH3)2]3+-cis		0.501796	0.762	1.43525	1.917			8.58284	8.094	8.50448	8.057
			[Ni(H2O)(NH3)2]2+				1.25527	1.508			8.84253	8.574	8.66498	8.46								[Ni(H2O)2(NH3)2]3+-trans		0.552394	0.895	1.43554	1.917			8.58008	8.072	8.50413	8.057
			[Ni(H2O)(SH2)]2+				1.23509	1.344			8.75852	8.642	8.64965	8.592								[Ni(NH3)(SH2)2]3+		0.332663	0.547	1.08528	1.255			8.94051	8.733	8.84801	8.711
			[Ni(H2O)(SH2)2]2+				1.02688	1.106			9.01405	8.895	8.86568	8.821								[Ni(NH3)3(SH2)]3+		0.306805	0.635	1.07365	1.452			8.88993	8.499	8.85831	8.517
			[Ni(H2O)2(NH3)]2+				1.35234	1.596			8.75266	8.479	8.56495	8.367								[Ni(CH3)2]+		0.556925	0.658	1.14764	1.369			8.95133	8.744	8.743	8.595
			[Ni(H2O)2(NH3)2]2+-cis				1.27212	1.516			8.89126	8.611	8.66588	8.459								[Ni(CO)3]3+		0.561293	0.958	1.37333	2.123			8.63206	7.881	8.56906	7.812
			[Ni(H2O)2(NH3)2]2+-trans				1.27208	1.516			8.89895	8.626	8.6659	8.459								[Ni(CO)4]3+		0.46184	0.963	1.20154	1.908			8.73817	8.061	8.70552	7.972
			[Ni(H2O)2(SH2)]2+				1.24419	1.379			8.82474	8.64	8.6606	8.566								[Ni(CO)5]3+		0.355171	0.735	1.1671	1.948			8.84889	8.184	8.77096	7.982
			[Ni(NH3)(SH2)]2+				1.15067	1.275			8.84759	8.742	8.75043	8.674								[Ni(CO)6]3+		0.363959	0.492	1.07922	1.832			8.89768	8.368	8.87266	8.109
			[Ni(NH3)(SH2)2]2+				0.891077	1.032			9.08713	8.947	9.00446	8.9								[Ni(H2O)2]3+		0.420828	0.712	1.69236	2.341			8.36021	7.699	8.26515	7.629
			[Ni(NH3)2(SH2)]2+				1.11584	1.301			9.0099	8.81	8.72557	8.622								[Ni(H2O)3]3+		0.596238	0.734	1.62663	2.23			8.3724	7.801	8.30944	7.735
			[Ni(NH3)3(SH2)]2+				0.935106	1.243			9.12366	8.84	8.96942	8.715								[Ni(H2O)4]3+		0.531619	0.802	1.65773	2.166			8.39056	7.851	8.28297	7.805
			[Ni(CH3)]+				1.14128	1.303			9.11779	8.935	8.77672	8.656								[Ni(H2O)5]3+		0.554233	0.72	1.71794	2.185			8.40926	7.932	8.25159	7.796
			[Ni(CH3)2]				0.832397	0.901			9.39908	9.162	9.0088	9.047								[Ni(H2O)6]3+		0.569311	0.667	1.84075	2.241			8.38126	7.932	8.15502	7.746
			[Ni(CO)]2+				1.56588	1.891			8.55305	8.089	8.38895	8.009								[Ni(NH2)]2+		0.366921	0.54	1.57357	1.989			8.51293	8.081	8.38591	7.978
			[Ni(CO)2]2+				1.38264	1.862			8.71469	8.132	8.51307	8.037								[Ni(NH2)2]+		0.477171	0.602	1.05594	1.495			8.69273	8.417	8.70845	8.421
			[Ni(CO)3]2+				1.20983	1.603			8.8888	8.422	8.65722	8.224								[Ni(NH3)(NH2)]2+		0.637032	0.633	1.34701	1.755			8.60209	8.247	8.56865	8.214
			[Ni(CO)4]2+				0.983556	1.37			8.99162	8.588	8.82469	8.336								[Ni(NH3)2(NH2)]2+		0.1976	0.511	1.33137	1.672			8.75634	8.373	8.57317	8.298
			[Ni(CO)5]2+				0.926919	1.281			9.00526	8.545	8.93397	8.474								[Ni(NH3)3]3+		0.545666	0.883	1.35538	1.823			8.6515	8.142	8.58542	8.154
			[Ni(CO)6]2+				0.829177	1.21			9.13561	8.607	9.07956	8.605								[Ni(NH3)4]3+		0.577332	0.894	1.21333	1.707			8.65294	8.227	8.72438	8.269
			[Ni(H2O)]2+				1.58892	1.807			8.43488	8.173	8.3724	8.148								[Ni(NH3)5]3+		0.395155	0.607	1.25292	1.712			8.84105	8.377	8.71272	8.275
			[Ni(H2O)2]2+				1.38634	1.687			8.54442	8.239	8.47116	8.229								[Ni(NH3)6]3+		0.305473	0.472	1.29676	1.705			8.91688	8.415	8.69147	8.29
			[Ni(H2O)3]2+				1.4233	1.681			8.62774	8.348	8.48804	8.275								[Ni(OH)]2+		0.32108	0.667	1.64939	2.184			8.36644	7.843	8.31448	7.766
			[Ni(H2O)4]2+				1.46406	1.686			8.66951	8.402	8.47145	8.286								[Ni(OH)(H2O)]2+		0.334422	0.743	1.50943	2.065			8.37637	7.86	8.32897	7.827
			[Ni(H2O)5]2+				1.49667	1.69			8.6114	8.342	8.4693	8.291								[Ni(OH)(H2O)2]2+		0.378658	0.638	1.55969	2.035			8.44551	7.992	8.33147	7.909
			[Ni(H2O)6]2+				1.49795	1.683			8.59912	8.313	8.49614	8.306								[Ni(OH)(H2O)3]2+		0.361971	0.658	1.58099	1.987			8.48014	8.043	8.33695	7.975
			[Ni(NH2)]+				1.02213	1.265			8.86042	8.678	8.84127	8.668								[Ni(OH)2]+		0.544432	0.574	1.46501	1.909			8.42935	8.104	8.28648	7.955
			[Ni(NH2)2]				0.269407	1.097			9.19082	8.796	9.44146	8.809								[Ni(OH)3]		0.500619	0.613	1.60112	1.798			8.40237	8.228	8.24881	8.137
			[Ni(NH3)]2+				1.53509	1.746			8.61589	8.364	8.42741	8.222								[Ni(OH)4]−		0.678633	0.716	1.9668	1.784			8.16876	8.203	7.95037	8.179
			[Ni(NH3)(NH2)]+				0.897575	1.213			8.91988	8.725	8.87797	8.709								[Ni(PH2)]2+		0.949867	0.936	1.3324	1.428				8.753	8.63729	8.54
			[Ni(NH3)2]2+				1.29123	1.54			8.73752	8.518	8.62405	8.425								[Ni(PH2)2]+		0.280758	0.352	0.745461	0.996			9.23495	9.13	9.0972	8.914
			[Ni(NH3)2(NH2)]+				0.729301	1.186			9.11916	8.87	9.12525	8.773								[Ni(PH2)3]		0.045772	0.192	0.0890283	0.611			9.64886	9.17	9.75688	9.131
			[Ni(NH3)3]2+				1.1413	1.427			8.91453	8.651	8.77862	8.545								[Ni(PH3)(PH2)]2+		0.371422	0.46	0.945038	1.114			9.04798	8.985	8.96249	8.837
			[Ni(NH3)4]2+				1.07213	1.403			9.06959	8.755	8.85406	8.574								[Ni(PH3)2(PH2)]2+		0.128818	0.323	0.671855	1.033			9.27658	9.069	9.21378	8.868
			[Ni(NH3)5]2+				1.02049	1.364			9.07426	8.7	8.94244	8.624								[Ni(PH3)3]3+		0.116377	0.294	0.869561	0.992			9.28028	9.082	9.06886	8.953
			[Ni(NH3)6]2+				0.875744	1.339			9.25175	8.657	9.11484	8.656								[Ni(PH3)4]3+		-0.00982683	0.498	0.363664	0.791			9.51036	8.988	9.54342	9.088
			[Ni(OH)]+				1.16784	1.451			8.73651	8.547	8.7067	8.467								[Ni(PH3)5]3+		0.0832413	0.363	0.203002	0.905			9.54968	8.994	9.72923	8.983
			[Ni(OH)(H2O)]+				1.09772	1.412			8.69665	8.547	8.66526	8.477								[Ni(SH)]2+		0.70345	0.478	1.36528	1.461				8.642	8.60504	8.513
			[Ni(OH)(H2O)2]+				1.1201	1.418			8.74565	8.556	8.68686	8.506								[Ni(SH)2]+		0.275463	0.393	0.82078	0.946			9.00792	8.948	9.01448	8.973
			[Ni(OH)(H2O)3]+				1.17597	1.434			8.8319	8.624	8.69656	8.524								[Ni(SH)3]		0.271141	0.273	0.805394	0.95			8.93378	8.903	9.00341	8.93
			[Ni(OH)2]				1.097	1.316			8.7513	8.613	8.59605	8.549								[Ni(SH2)(SH)]2+		0.249697	0.322	1.0831	1.159			8.90202	8.847	8.83579	8.787
			[Ni(OH)3]−				1.17079	1.306			8.79547	8.695	8.6611	8.631								[Ni(SH2)2]3+		0.82128	0.842	1.22322	1.22			8.73984	8.665		8.756
			[Ni(OH)4]2−				1.58033	1.352			8.67849	8.702	8.31147	8.611								[Ni(SH2)2(SH)]2+		0.141102	0.209	0.787916	0.993			9.09985	9.01	9.09599	8.931
			[Ni(PH2)]+				0.893163	0.883			9.16863	9.192	9.00574	9.033								[Ni(SH2)3]3+		0.259624	0.295	0.946594	1.046			9.07102	9.006	8.98549	8.903
			[Ni(PH2)2]				0.0954774	0.495			9.5622	9.306	9.73199	9.323								[Ni(SH2)4]3+		0.164314	0.345	0.614312	0.828			9.2632	9.066	9.30003	9.094
			[Ni(PH2)3]−				0.0260508	0.582			9.78939	9.145	9.88091	9.144								[Ni(SH2)5]3+		0.107712	0.321	0.427363	0.824			9.40022	9.077	9.503	9.109
			[Ni(PH3)]2+				1.31726	1.35			8.82633	8.829	8.6469	8.607								[Ni(SH2)6]3+		0.0937084	0.173	0.249071	0.809			9.46236	9.082	9.70431	9.131
			[Ni(PH3)(PH2)]+				0.705702	0.925			9.37471	9.217	9.12803	8.972								AVERAGE		0.424565	0.59187	1.20269	1.56574			8.77596	8.41845	8.71131	8.35601

## Sheet: S3
		Table S3 dn configuration and number of unpaired electrons in d-shell of Ni(II) complexes obtained by Mulliken population analysis, for various density functionals.
		GGA																														meta-GGA										HYBRID
				OPBE					S12g					BLYP					PW91					BP86					PBE					TPSS					M06-L					b3lyp					PBE0
		HS			LS		HS			LS		HS			LS		HS			LS		HS			LS		HS			LS		HS			LS		HS			LS		HS			LS		HS
	[Ni(AcO)]+	8.3257	1.3931		8.471	0	8.2783	1.3881		8.4459	-0.0001	8.2773	1.3803		8.4374	0	8.292	1.3878		8.4492	0	8.2889	1.3845		8.4474	0	8.31	1.3264		8.449	0	0	0		8.429	0	0	0		8.3702	0	8.1504	1.5306		8.4532	0	0	0
	[Ni(CN)]+	8.5054	1.3102		8.6093	-0.0023	8.4945	1.2953		8.6189	-0.0043	8.5002	1.2852		8.6168	-0.0016	8.4927	1.3051		8.6017	-0.0313	8.499	1.2942		8.6093	-0.0023	8.4865	1.3093		8.6059	-0.0143	8.4382	1.3398		8.5625	-0.0021	8.3728	1.424		8.5381	-0.0021	8.4028	1.4104		8.704	0	8.2725	1.5559
	[Ni(CN)2]	8.4555	1.2969		8.7932	0	8.4182	1.3052		8.7552	0	8.4113	1.3023		8.7804	0	8.4246	1.31		8.7862	0	8.4113	1.3049		8.7872	0	8.4276	1.3032		8.783	0	8.3568	1.3604		8.7528	0	8.2221	1.4633		8.7186	0	8.2194	1.5352		8.7606	0	8.1833	1.5903
	[Ni(CN)3]−	8.481	1.1156		8.672	0	8.4643	1.1211		8.625	0	8.5053	1.0937		8.6436	0	8.4934	1.0962		8.6664	0	8.4971	1.0949		8.6678	0	8.4816	1.1036		8.6426	0	8.4444	1.1224		8.6096	0	8.3874	1.2142		8.5658	0	8.3763	1.3343		8.637	0	8.3334	1.3954
	[Ni(CN)4]2−	8.3575	1.1659		8.7158	0	8.3295	1.1855		8.6808	0	8.3333	1.1623		8.7084	0	8.3589	1.1367		8.7114	0	8.36	1.1388		8.713	0	8.3516	1.1384		8.7052	0	8.2661	1.2365		8.6774	0	8.1944	1.3578		8.6328	0	8.2254	1.3944		8.707	0	8.188	1.4318
	[Ni(CO3)]	8.4976	1.2702		8.6808	0	8.4637	1.2709		8.6398	0	8.4744	1.2442		8.6524	0	8.4818	1.2504		8.663	0	8.4898	1.259		8.6644	0	8.4787	1.2507		8.661	0	8.4545	1.3019		8.6336	0	8.3948	1.3748		8.5828	0	8.4075	1.4005		8.6608	0	8.3851	1.4477
	[Ni(CS)]2+	8.2675	1.5795		8.4286	0	8.2707	1.5839		8.4244	0	8.2733	1.5779		8.424	0	8.267	1.589		8.4212	0	8.2694	1.589		8.4148	0	8.2445	1.5695		8.4179	-0.0003	8.1876	1.6446		8.3736	0	8.1365	1.6889		8.3394	0	8.1233	1.6861		8.524	0	8.1078	1.7188
	[Ni(CS)2]2+	8.2146	1.5936		8.4346	0	8.1909	1.5623		8.4154	0	8.2262	1.5306		8.4128	0	8.2119	1.5565		8.4184	0	8.2206	1.5774		8.4108	0	8.2161	1.5673		8.4136	0	8.1453	1.6537		8.364	0	8.0872	1.697		8.3132	0	8.093	1.7042		8.518	0	8.0752	1.7214
	[Ni(CS)3]2+	8.203	1.3786		8.5692	0	8.1815	1.3881		8.5496	0	8.2012	1.389		8.5776	0	8.195	1.3718		8.574	0	8.1953	1.3703		8.5768	0	8.1934	1.3728		8.5678	0	8.1585	1.4225		8.5336	0	8.0953	1.4891		8.507	0	8.124	1.54		8.6164	0	8.0915	1.5645
	[Ni(CS)4]2+	8.1708	-0.0018		8.6314	0	8.1554	0.0224		8.5954	0	8.1911	0.0331		8.6284	0	8.1885	0.0147		8.6296	0	8.191	0.0106		8.6322	0	8.1756	-0.0208		8.623	0	8.1613	-0.0079		8.599	0.0002	8.0807	-0.0425		8.5148	0	8.3236	0		8.6552	0	8.0462	0.0118
	[Ni(en)]2+	8.272	1.4928		8.3827	-0.0415	8.2653	1.4881		8.3886	-0.0076	8.294	1.4684		8.3941	-0.0259	8.2919	1.4729		8.3942	-0.0206	8.2779	1.4851		8.3963	-0.0205	8.2872	1.4762		8.3798	-0.0316	8.2199	1.5193		8.3675	0.0073	8.16	1.603		8.3003	0.0215	8.1596	1.5998		8.4712	0	8.1067	1.6261
	[Ni(en)2]2+	8.0413	1.4207		8.3746	0	8.038	1.411		8.3406	0	8.1089	1.3819		8.3486	0	8.0791	1.3935		8.3514	0	8.074	1.389		8.3526	0	8.0668	1.4046		8.3476	0	8.0104	1.485		8.2944	0	7.9145	1.5535		8.2716	0	7.9088	1.5902		8.2628	0	7.8609	1.6021
	[Ni(form.)]2+	8.3402	1.479		8.366	-0.1852	8.3435	1.4695		8.4015	-0.1887	8.3482	1.4782		8.3784	-0.1668	8.3452	1.4802		8.3742	-0.1682	8.3448	1.484		8.3868	-0.181	8.3437	1.4801		8.3647	0.1635	8.3002	1.5134		8.3424	-0.266	8.2066	1.5786		8.2816	-0.2948	8.2915	1.5653		8.4394	0	8.2335	1.5973
	[Ni(form.)2]2+	8.3312	1.3644		8.427	-0.148	8.3173	1.3349		8.3931	-0.0573	8.3135	1.3239		8.4001	-0.0537	8.3287	1.3343		8.4087	-0.0737	8.3274	1.3422		8.4096	-0.0766	8.3251	1.3347		8.4003	0.0737	8.2516	1.3968		8.3665	-0.1451	8.1242	1.4908		8.326	-0.241	8.1642	1.5724		8.423	0	8.1038	1.6186
	[Ni(form.)3]2+	8.0804	1.4072		8.2402	0	8.0611	1.3913		8.207	0	8.1245	1.3629		8.1998	0	8.1098	1.4178		8.2252	0	8.1337	1.4043		8.2254	0	8.1016	1.4088		8.2228	0	8.0925	1.4443		8.1529	-0.0001	7.9747	1.5051		8.152	0	7.9593	1.5841		8.097	0	7.8974	1.7012
	[Ni(form.)4]2+	7.9613	1.4781		8.414	0	7.9281	1.4705		8.3752	0	7.9613	1.4485		8.385	0	7.9626	1.4482		8.3958	0	7.9771	1.4417		8.397	0	7.9698	1.4394		8.3906	0	7.9037	1.4663		8.3534	0	7.8159	1.5105		8.2622	0	7.7564	1.6636		8.342	0	7.7896	1.7326
	[Ni(NC)]+	8.5362	1.27		8.5707	-0.0011	8.5215	1.2465		8.5744	-0.0006	8.5501	1.2701		8.6141	0.0003	8.5463	1.2647		8.59	-0.0008	8.5377	1.2639		8.6111	-0.0109	8.5664	1.2488		8.6027	0.0003	8.4737	1.3155		8.5622	0.0094	8.3507	1.3793		8.519	-0.0002	8.4798	1.355		8.7062	0	8.4366	1.406
	[Ni(NC)2]	8.43	1.2952		8.4668	0.1068	8.3993	1.2735		8.4112	0.015	8.4011	1.2977		8.4461	0.0643	8.4205	1.2779		8.4476	0.0798	8.417	1.2882		8.4436	0.0878	8.4139	1.2771		8.4242	0.0714	8.3376	1.3612		8.3951	0.1209	8.1881	1.4583		8.335	0.1466	8.0614	1.686		8.443	0	8.1269	1.6047
	[Ni(NC)3]−	8.3154	1.3404		8.5216	0	8.269	1.3496		8.4932	0	8.3185	1.3321		8.5176	0	8.3024	1.3096		8.5078	0	8.2895	1.3075		8.5272	0	8.2981	1.3177		8.504	0	8.2759	1.4179		8.4614	0	8.144	1.5058		8.4038	0	8.1747	1.5531		8.4444	0	8.0746	1.531
	[Ni(NC)4]2−	8.1414	1.448		8.4842	0	8.0891	1.4313		8.4576	0	8.1205	1.4175		8.4736	0	8.1236	1.3958		8.476	0	8.1191	1.4153		8.4774	0	8.1141	1.4113		8.4724	0	8.0412	1.5008		8.4052	0	7.9757	1.5661		8.3784	0	7.9491	1.6281		8.3906	0	7.9316	1.6424
	[Ni(NCS)]+	8.6788	1.1112		8.6766	-0.0002	8.6692	1.1032		8.6438	0.0002	8.6833	1.0693		8.6471	-0.0001	8.6884	1.0872		8.6573	-0.0001	8.6876	1.0878		8.6582	0	8.6823	1.0905		8.6536	0	8.6501	1.1151		8.6284	0	8.6033	1.1787		8.5669	-0.0003	8.6728	1.1012		8.7142	0	8.5801	1.2701
	[Ni(NCS)2]	8.4649	1.1447		8.4915	0.0049	8.4335	1.1327		8.4308	0.0002	8.4409	1.1159		8.4712	-0.0048	8.4534	1.1264		8.47	-0.001	8.4646	1.1144		8.4714	-0.0006	8.4765	1.0975		8.4545	-0.0069	8.4338	1.1792		8.4163	-0.0013	8.3016	1.3022		8.3617	-0.0001	8.3566	1.3304		8.5156	0	8.2619	1.4265
	[Ni(H2O)(NH3)]2+	8.2028	1.6052		8.2516	0.0394	8.2008	1.5898		8.2899	0.0195	8.2009	1.5967		8.2809	0.0223	8.1964	1.5894		8.269	0.0364	8.2017	1.5867		8.272	0.0436	8.2107	1.5901		8.2648	0.0384	8.1404	1.6256		8.2422	0.0288	8.0296	1.6676		8.2038	-0.0092	8.0379	1.7669		8.3882	0	8.0167	1.7489
	[Ni(H2O)(NH3)2]2+	8.126	1.5656		8.4692	0	8.1423	1.5503		8.4424	0	8.1483	1.5499		8.4626	0	8.1581	1.5503		8.426	0	8.1507	1.5397		8.452	0	8.1342	1.5328		8.4226	0	8.06	1.6044		8.4226	0	8.0059	1.6031		8.3588	0	7.9776	1.6328		8.3708	0	7.9754	1.7142
	[Ni(H2O)(SH2)]2+	8.3424	1.4678		8.4589	0.1045	8.3405	1.4641		8.4437	0.1269	8.3557	1.4587		8.4418	0.1308	8.3512	1.4646		8.4563	0.1335	8.3432	1.4668		8.4671	0.1369	8.3455	1.4687		8.4441	0.1267	8.2962	1.5218		8.4191	0.1431	8.1909	1.6163		8.3515	0.1353	8.183	1.6202		8.4744	0	8.1119	1.6733
	[Ni(H2O)(SH2)2]2+	8.2997	1.3663		8.5478	0	8.2902	1.3648		8.5267	-0.0001	8.3112	1.3256		8.5981	0.0001	8.3014	1.3334		8.5601	0.0001	8.3024	1.3304		8.5628	0	8.2946	1.3356		8.556	0	8.2435	1.4187		8.5226	0	8.1302	1.4794		8.4834	0	8.128	1.5652		8.5202	0	8.1212	1.6424
	[Ni(H2O)2(NH3)]2+	8.1416	1.548		8.4444	0	8.1242	1.5272		8.4212	0	8.1317	1.5239		8.415	0	8.1256	1.5168		8.4372	0	8.12	1.5124		8.4386	0	8.1146	1.51		8.4336	0	8.0675	1.5889		8.4062	0	7.9881	1.6669		8.3562	0	8.0383	1.6629		8.3474	0	7.9266	1.7048
	[Ni(H2O)2(NH3)2]2+-cis	8.2381	1.5201		8.4784	0	8.2057	1.4937		8.4442	0	8.2381	1.4973		8.4584	0	8.2379	1.5047		8.4908	0	8.2379	1.5049		8.4932	0	8.233	1.505		8.4844	0	8.1827	1.5365		8.4278	0	8.1091	1.6319		8.3586	0	8.1245	1.6625		8.4254	0	8.0769	1.7185
	[Ni(H2O)2(NH3)2]2+-trans	8.1378	1.5076		8.4872	0	8.1313	1.5041		8.451	0	8.1545	1.5039		8.4612	0	8.1529	1.5103		8.467	0	8.1521	1.5105		8.4694	0	8.1477	1.5091		8.4636	0	8.0903	1.5179		8.4202	0	8.0228	1.5894		8.3642	0	8.0182	1.6304		8.3738	0	7.9871	1.6583
	[Ni(H2O)2(SH2)]2+	8.2294	1.4586		8.4996	0	8.2023	1.4657		8.4159	0.0817	8.228	1.4444		8.5038	0	8.2234	1.4486		8.4997	-0.0001	8.2311	1.4559		8.522	0	8.2213	1.4515		8.5144	0	8.1883	1.5129		8.4816	0	8.0514	1.6102		8.4094	0	8.097	1.6176		8.4236	0	8.054	1.6616
	[Ni(NH3)(SH2)]2+	8.3292	1.48		8.4352	-0.0402	8.3064	1.4748		8.4152	0.0062	8.3299	1.4553		8.4384	-0.0256	8.3142	1.457		8.4019	0.0069	8.2978	1.4684		8.4066	0.0246	8.3133	1.4627		8.4087	0.0185	8.275	1.504		8.3586	-0.0324	8.1135	1.6147		8.2865	0.0025	8.1093	1.6041		8.5362	0	8.075	1.684
	[Ni(NH3)(SH2)2]2+	8.3018	1.3424		8.5478	0	8.258	1.311		8.5144	0	8.3261	1.2921		8.5418	0	8.3098	1.294		8.5378	0	8.31	1.2928		8.541	0	8.3007	1.2961		8.5322	0	8.2502	1.353		8.5084	0	8.174	1.4818		8.4734	0	8.1891	1.5535		8.5142	0	8.0949	1.5397
	[Ni(NH3)2(SH2)]2+	8.2274	1.3854		8.5808	0	8.2186	1.3924		8.5566	0	8.2272	1.3792		8.5756	0	8.2421	1.3869		8.5794	0	8.2342	1.3784		8.5824	0	8.2348	1.3868		8.575	0	8.1959	1.4157		8.5392	0	8.0994	1.5082		8.483	0	8.1529	1.5089		8.5298	0	8.1107	1.5719
	[Ni(NH3)3(SH2)]2+	8.1809	1.3951		8.4986	0	8.1614	1.4054		8.467	0	8.2019	1.3813		8.4852	0	8.1728	1.3666		8.4886	0	8.1779	1.3713		8.4908	0	8.1709	1.3715		8.4832	0	8.1025	1.4205		8.458	0	8.0617	1.5185		8.4356	0	8.0247	1.5381		8.3994	0	7.9672	1.6008
	[Ni(CH3)]+	8.4124	1.3252		8.7564	-0.0112	8.3645	1.3623		8.7026	0.014	8.4025	1.3503		8.7254	-0.0166	8.4023	1.3479		8.7124	0.0156	8.3959	1.3499		8.6861	-0.0111	8.4204	1.366		8.6943	-0.0115	0	0		8.6807	-0.0193	0	0		8.652	0.0302	8.3587	1.3979		8.8728	0	0	0
	[Ni(CH3)2]	8.417	1.1826		8.7174	0	8.3633	1.2129		8.6782	0	8.3663	1.1861		8.6946	0	8.3857	1.1981		8.6968	0	8.3738	1.1926		8.7	0	8.3692	1.199		8.6918	0	8.3248	1.2592		8.6836	0	8.1686	1.4674		8.6284	0	8.24	1.3974		8.6958	0	8.1833	1.4567
	[Ni(CO)]2+	8.1581	1.6979		8.2888	0	8.1503	1.7059		8.2838	0	8.1556	1.7122		8.2766	0	8.1623	1.7297		8.2762	0	8.1501	1.7087		8.2714	0	8.1669	1.7239		8.276	0	8.1232	1.7476		8.2328	0	8.076	1.7896		8.1934	0	8.0797	1.8133		8.3722	0.0002	8.0637	1.8277
	[Ni(CO)2]2+	8.1774	1.6876		8.361	0	8.1594	1.6924		8.3415	0.0001	8.1584	1.687		8.3368	0	8.17	1.6904		8.3424	0	8.1627	1.6929		8.338	0	8.1678	1.69		8.3394	0	8.1336	1.7238		8.2917	0.0001	8.0827	1.7513		8.2454	0	8.0897	1.7751		8.4264	0	8.0735	1.7899
	[Ni(CO)3]2+	8.2758	1.5372		8.627	0	8.2468	1.5516		8.6064	0	8.2663	1.5385		8.6196	0	8.2692	1.5368		8.6232	0	8.2706	1.536		8.6246	0	8.2665	1.5365		8.619	0	8.2189	1.5843		8.5938	0	8.1564	1.6376		8.5352	0	8.182	1.635		8.5664	0	8.1381	1.6763
	[Ni(CO)4]2+	8.2316	1.3446		8.6904	0	8.2105	1.3549		8.6588	0	8.2846	1.3478		8.686	0	8.2712	1.3256		8.69	0	8.2912	1.3466		8.6928	0	8.2675	1.3265		8.6846	0	8.2432	1.3942		8.6368	0	8.1628	1.4688		8.597	0	8.1667	1.5033		8.6668	0	8.1703	1.5647
	[Ni(CO)5]2+	8.2353	1.3053		8.407	0	8.2087	1.3433		8.3644	0	8.2639	1.3099		8.4718	0	8.2836	1.2968		8.4466	0	8.2568	1.2754		8.4288	0	8.2278	1.2752		8.3814	0	8.2395	1.3699		8.3958	0	8.0533	1.4675		8.2406	0	8.1791	1.4415		8.3872	0	8.1186	1.5284
	[Ni(CO)6]2+	8.3595	1.2505		8.4818	0.0008	8.3542	1.2658		8.4557	0.0009	8.4236	1.255		8.4818	-0.0002	8.3705	1.2137		8.4813	0.0009	8.4097	1.2483		8.4823	-0.0025	8.3464	1.2296		8.4545	0.0083	8.331	1.3118		8.4014	-0.0122	8.2905	1.3939		8.3632	0.0132	8.3282	1.4316		8.4784	0	8.2577	1.4413
	[Ni(H2O)]2+	8.2368	1.6298		8.3164	0.2472	8.2354	1.6212		8.3229	0.2403	8.2451	1.6363		8.3163	0.2385	8.2398	1.6356		8.3192	0.2338	8.2294	1.6336		8.3091	0.2425	8.233	1.6314		8.3183	0.2335	8.1974	1.6684		8.2793	0.2269	8.1311	1.7009		8.2451	0.2089	8.1063	1.7555		8.2788	0	8.0747	1.7905
	[Ni(H2O)2]2+	8.3073	1.5317		8.3808	0.1434	8.2918	1.5156		8.3755	0.1491	8.2917	1.5303		8.3793	0.1481	8.2932	1.5344		8.382	0.1464	8.2918	1.5356		8.3813	0.1501	8.2896	1.5352		8.3796	-0.145	8.2429	1.5825		8.3464	0.1342	8.1528	1.657		8.2969	0.1277	8.1445	1.6843		8.3176	0	8.1061	1.7237
	[Ni(H2O)3]2+	8.1142	1.5252		8.2537	0.0009	8.1084	1.5284		8.2288	0.0002	8.1174	1.5196		8.2354	-0.0054	8.1193	1.5287		8.2517	-0.0041	8.1421	1.5529		8.2339	-0.0417	8.1009	1.5279		8.2335	-0.0219	8.0812	1.5798		8.1925	-0.0001	7.9824	1.691		8.1395	0.0105	8.0081	1.6807		8.2444	0	7.97	1.6922
	[Ni(H2O)4]2+	8.0845	1.6335		8.3278	0	8.0698	1.6134		8.295	0	8.0865	1.6285		8.2996	0	8.0748	1.6196		8.3102	0	8.0718	1.6196		8.3112	0	8.0834	1.6276		8.307	0	8.0247	1.6479		8.2782	0	7.9642	1.6878		8.2026	0	7.9506	1.7056		8.2058	0	7.9186	1.7416
	[Ni(H2O)5]2+	7.9513	1.6077		8.127	-0.0538	7.9591	1.6127		8.0982	-0.065	7.9637	1.6231		8.1445	-0.0557	7.9604	1.619		8.1406	-0.0582	7.9576	1.6176		8.1292	-0.0494	7.9573	1.6195		8.1269	0.0499	7.8895	1.6377		8.0851	-0.0593	7.8659	1.6743		8.0192	-0.0336	7.8624	1.7594		8.0152	0	7.8296	1.7472
	[Ni(H2O)6]2+	8.127	1.617		8.1336	0.0032	8.1026	1.6012		8.1271	-0.0311	8.0919	1.5685		8.1765	-0.0049	8.1184	1.6144		8.1648	-0.014	8.1137	1.6325		8.1822	-0.0172	8.1307	1.6181		8.1846	0.0104	8.1035	1.6265		8.1298	-0.0218	8.0038	1.6888		8.0411	-0.0037	7.9811	1.7181		8.1432	0	7.9486	1.7448
	[Ni(NH2)]+	8.6399	1.1707		8.6821	0.4719	8.6196	1.1832		8.6676	0.4536	8.649	1.1616		8.671	0.459	8.6528	1.1634		8.674	0.462	8.6501	1.1685		8.6828	0.4796	8.6471	1.1663		8.6124	-0.006	8.6021	1.2051		8.6654	0.496	8.5163	1.2467		8.638	0.5636	8.6363	1.1727		8.6558	0	8.623	1.174
	[Ni(NH2)2]	8.3538	1.2078		8.5734	0	8.3016	1.2272		8.5396	0	8.3506	1.1988		8.5794	0	8.3296	1.1944		8.5858	0	8.3332	1.206		8.5858	0	8.3168	1.2036		8.5594	0	8.2765	1.2247		8.5578	0	8.1668	1.3518		8.4924	0	8.2502	1.383		8.5602	0	8.2033	1.4607
	[Ni(NH3)]2+	8.1806	1.6566		8.3093	0.0003	8.1935	1.6589		8.2914	-0.0004	8.1878	1.6608		8.318	-0.0104	8.1951	1.6629		8.2874	0.009	8.1952	1.667		8.2758	-0.0068	8.1798	1.6716		8.2926	0.004	8.153	1.7028		8.2777	0.0039	8.1033	1.7523		8.2305	0.0207	8.1237	1.7183		8.4207	-0.0001	8.1024	1.7486
	[Ni(NH3)(NH2)]+	8.5568	1.166		8.58	-0.3698	8.5317	1.1739		8.5554	-0.2538	8.5394	1.1736		8.5598	-0.2076	8.5342	1.1564		8.5902	-0.3004	8.523	1.1732		8.5976	-0.3198	8.5413	1.1751		8.546	0.282	8.497	1.2166		8.5628	-0.3754	8.3426	1.3388		8.5292	-0.4164	8.4713	1.2527		8.5556	0	8.4686	1.2662
	[Ni(NH3)2]2+	8.2804	1.5624		8.332	-0.0018	8.242	1.5526		8.3133	-0.0027	8.2546	1.5462		8.3078	0.0032	8.246	1.5582		8.3037	0.0179	8.2628	1.5598		8.2926	-0.0122	8.2513	1.5501		8.3147	0.0001	8.2291	1.6041		8.2843	0.0029	8.1313	1.6907		8.2205	-0.0149	8.143	1.7024		8.49	0	8.1051	1.6951
	[Ni(NH3)2(NH2)]+	8.3915	1.1877		8.5388	0	8.3431	1.1997		8.4572	0	8.3969	1.1689		8.4572	0	8.3947	1.1683		8.5048	0	8.3951	1.1653		8.5062	0	8.3891	1.1731		8.4708	0	8.3471	1.1869		8.4258	0	8.2891	1.2673		8.4086	0	8.321	1.2826		8.4568	0	8.2896	1.3416
	[Ni(NH3)3]2+	8.1869	1.4589		8.4774	0	8.1889	1.4881		8.4404	0	8.2288	1.4648		8.434	0	8.1849	1.4369		8.4462	0	8.2124	1.477		8.4464	0	8.1993	1.4725		8.4436	0	8.1418	1.5118		8.4308	0	8.083	1.6098		8.3674	0	8.0893	1.6113		8.3574	0	8.0415	1.6655
	[Ni(NH3)4]2+	8.1201	1.4707		8.4716	0	8.1006	1.469		8.414	0	8.1275	1.4605		8.449	0	8.1322	1.4748		8.4546	0	8.13	1.4728		8.4592	0	8.1187	1.4651		8.4492	0	8.071	1.526		8.439	0	7.992	1.5996		8.3396	0	8.0543	1.6685		8.4544	0	8.049	1.6884
	[Ni(NH3)5]2+	8.2495	1.4583		8.5006	0	8.2307	1.4719		8.4926	0	8.2672	1.456		8.5072	0	8.3092	1.4652		8.5094	0	8.2778	1.4824		8.5112	0	8.271	1.484		8.5048	0	8.2028	1.4906		8.474	0	8.1948	1.5686		8.4338	0	8.1581	1.5871		8.49	0	8.1181	1.6521
	[Ni(NH3)6]2+	8.3068	1.5056		8.3233	-0.0127	8.2931	1.5071		8.2551	-0.0137	8.3354	1.4998		8.2966	-0.0248	8.3246	1.5032		8.3225	-0.0073	8.3265	1.5053		8.3228	-0.0072	8.3181	1.5053		8.31	0	8.2882	1.5384		8.2652	-0.0004	8.192	1.604		8.2105	-0.0187	8.1955	1.5733		8.3224	0	8.2184	1.6514
	[Ni(OH)]+	8.4789	1.2735		8.4708	-0.124	8.4599	1.2605		8.5067	-0.1341	8.4643	1.2663		8.4863	-0.1299	8.4821	1.3019		8.4784	-0.1126	8.4799	1.3029		8.5089	-0.1113	8.4714	1.3074		8.5146	0.016	8.4421	1.3159		8.5002	-0.138	8.3917	1.3821		8.4766	-0.2502	8.4143	1.4021		8.5486	0	8.4022	1.4142
	[Ni(OH)(H2O)]+	8.3799	1.2861		8.4313	-0.0033	8.3207	1.2775		8.384	0.0012	8.3217	1.2587		8.4064	-0.0192	8.3476	1.2838		8.4078	-0.0008	8.3473	1.2847		8.3998	0.001	8.342	1.2854		8.4011	0.0327	8.3228	1.3216		8.3841	-0.0179	8.1892	1.3912		8.3337	-0.0223	8.2692	1.4288		8.4864	0	8.2383	1.4595
	[Ni(OH)(H2O)2]+	8.2836	1.3428		8.3446	0.0124	8.2418	1.3442		8.3074	0.0092	8.2533	1.3193		8.3154	0.017	8.2662	1.3318		8.3232	0.0138	8.2676	1.331		8.3228	0.0182	8.257	1.3488		8.3149	0.0123	8.2442	1.3668		8.2946	0.0108	8.1445	1.4557		8.2444	0.0284	8.158	1.489		8.2968	0	8.1458	1.5578
	[Ni(OH)(H2O)3]+	8.1989	1.4263		8.3526	0	8.1563	1.4109		8.3156	0	8.1762	1.3736		8.3196	0	8.1955	1.3887		8.3164	0	8.1959	1.3895		8.3192	0	8.1923	1.3927		8.3164	0	8.1564	1.428		8.2908	0	8.068	1.5058		8.2184	0	8.0499	1.5241		8.1994	0	8	1.5788
	[Ni(OH)2]	8.3566	1.2672		8.5007	0.0361	8.3245	1.2899		8.4738	0.0274	8.3425	1.2717		8.4815	0.0397	8.3461	1.2645		8.4864	0.0402	8.3425	1.2637		8.4832	0.0428	8.3251	1.2883		8.4116	0.0004	8.3136	1.3146		8.4518	0.0508	8.1628	1.4362		8.3525	0.0795	8.2163	1.4525		8.4786	0	8.1728	1.5002
	[Ni(OH)3]−	8.2281	1.3519		8.3366	0	8.1783	1.3329		8.2932	0	8.1942	1.3208		8.2992	0	8.2081	1.3313		8.2806	0	8.21	1.333		8.2738	0	8.2128	1.3242		8.2678	0	8.1434	1.3678		8.247	0	8.1115	1.4011		8.1844	0	8.0906	1.4792		8.2224	0	8.0676	1.5792
	[Ni(OH)4]2−	8.0832	1.5334		8.1844	0	8.0403	1.5109		8.1422	0	8.116	1.4778		8.1974	0	8.0962	1.4856		8.2142	0	8.1276	1.4768		8.1966	0	8.1041	1.4765		8.1904	0	8.0578	1.519		8.1724	0	7.9951	1.5927		8.0872	0	7.9923	1.6287		8.1592	0	7.9632	1.6292
	[Ni(PH2)]+	8.7131	1.0653		8.8472	-0.0444	8.7245	1.0285		8.8359	0.0039	8.6706	1.1026		8.8574	0.0098	8.6697	1.0687		8.8495	0.0079	8.6857	1.0897		8.8514	0.0076	8.6827	1.0941		8.8431	-0.0075	8.6474	1.1282		8.8281	0.0101	8.6003	1.2031		8.7792	0.0144	8.6674	1.1192		8.8966	0	8.6898	1.1132
	[Ni(PH2)2]	8.7051	0.9333		8.9704	0	8.6831	0.9579		8.9238	0	8.7204	0.9228		8.9704	0	8.7143	0.9265		8.9682	0	8.7174	0.9244		8.9726	0	8.7042	0.9356		8.9614	0	8.657	0.9626		8.936	0	8.5363	1.1149		8.9164	0	8.6141	1.1329		9.0262	0	8.562	1.1856
	[Ni(PH2)3]−	8.5695	0.8823		8.7512	0	8.5453	0.8695		8.7218	0	8.6006	0.8198		8.777	0	8.5954	0.833		8.75	0	8.588	0.8232		8.7354	0	8.5879	0.8549		8.7162	0	8.5299	0.9171		8.7486	0	8.4371	1.0575		8.6906	0	8.4581	1.0987		8.7908	0	8.406	1.1778
	[Ni(PH3)]2+	8.3569	1.5067		8.4648	-0.0224	8.3577	1.5229		8.4892	-0.0246	8.3578	1.522		8.5076	-0.0088	8.3608	1.5244		8.4913	-0.0207	8.3356	1.5266		8.4985	-0.0049	8.3455	1.5193		8.5043	0.0009	8.2808	1.5584		8.4374	-0.0168	8.1943	1.6031		8.3864	-0.0416	8.251	1.5954		8.6512	0	8.1926	1.6154
	[Ni(PH3)(PH2)]+	8.6052	0.9638		8.8648	0	8.4316	1.1026		8.8236	0	8.5491	1.0569		8.8554	0	8.5784	1.0284		8.8454	0	8.575	1.0186		8.8498	0	8.5635	1.0325		8.8396	0	0	0		8.8308	0	0	0		8.7972	0	8.5334	1.0508		8.8858	0	0	0
	[Ni(PH3)2]2+	8.442	1.3638		8.4638	0.0012	8.4332	1.3798		8.4499	-0.0021	8.4661	1.3789		8.4532	-0.002	8.4444	1.3762		8.4671	-0.0321	8.447	1.3594		8.4954	-0.0014	8.4377	1.3641		8.4977	0.0021	8.3957	1.4447		8.3946	0.0106	8.2943	1.5281		8.3856	0.0066	8.3338	1.525		8.6768	0	8.2656	1.5796
	[Ni(PH3)2(PH2)]+	8.6062	0.8588		8.7958	0	8.5673	0.8667		8.7804	0	8.6081	0.8395		8.8322	0	8.6091	0.8271		8.821	0	8.612	0.8246		8.8258	0	8.6015	0.8323		8.7954	0	8.5744	0.8932		8.7698	0	8.4724	0.9458		8.717	0	8.5674	0.929		8.7918	0	8.5495	0.9655
	[Ni(PH3)3]2+	8.4196	1.1634		8.6782	0	8.3597	1.1525		8.6324	0	8.4458	1.134		8.6804	0	8.4291	1.1529		8.6838	0	8.4391	1.1421		8.6848	0	8.4376	1.1582		8.6772	0	8.3681	1.2039		8.6698	0	8.2959	1.3997		8.6182	0	8.3109	1.3941		8.631	0	8.2424	1.4684
	[Ni(PH3)4]2+	8.3416	1.1498		8.694	0	8.3294	1.1572		8.6904	0	8.3846	1.1386		8.702	0	8.3682	1.1208		8.7182	0	8.3677	1.1175		8.7208	0	8.3609	1.1257		8.7158	0	8.3156	1.1768		8.7072	0	8.2083	1.2813		8.6228	0	8.2895	1.3169		8.7612	0	8.2176	1.391
	[Ni(PH3)5]2+	8.5146	1.1298		8.6474	0	8.4888	1.1326		8.6146	0	8.51	1.0554		8.6392	0	8.5442	1.106		8.6144	0	8.5179	1.0757		8.6184	0	8.5364	1.112		8.6478	0	8.4774	1.1558		8.6468	0	8.3723	1.2815		8.5982	0	8.4223	1.2855		8.642	0	8.3709	1.3677
	[Ni(SH)]+	8.6665	1.1367		8.7415	0.4037	8.636	1.1366		8.7218	0.3862	8.6599	1.1287		8.6829	0.4063	8.6401	1.1309		8.7337	0.3991	8.6502	1.1416		8.7161	0.4021	8.6359	1.1355		8.7295	0.3953	8.5962	1.2016		8.6939	0.4433	8.4661	1.3419		8.6369	0.6029	8.574	1.254		8.777	0	8.5747	1.2723
	[Ni(SH)2]	8.595	1.2236		8.6547	-0.0001	8.5424	1.238		8.5807	-0.0001	8.5617	1.2271		8.625	0	8.5617	1.2303		8.6146	-0.0002	8.5612	1.2346		8.6155	0.0001	8.5506	1.2408		8.6054	0	8.494	1.3098		8.598	2.71051e-20	8.3601	1.4389		8.4941	-0.0001	8.4055	1.4143		8.6926	0	8.3549	1.4793
	[Ni(SH2)]2+	8.4023	1.5041		8.4846	-0.0018	8.3775	1.5105		8.4846	0.0032	8.3668	1.4848		8.521	0.0008	8.3843	1.4999		8.4956	0.0046	8.3859	1.4963		8.4901	0.0061	8.381	1.5064		8.478	-0.012	8.3588	1.5292		8.4471	0.0009	8.2767	1.5731		8.4106	-0.0026	8.2937	1.5899		8.5912	0	8.222	1.6364
	[Ni(SH2)(SH)]+	8.5401	1.1881		8.6816	0	8.5117	1.1873		8.6392	0	8.523	1.1686		8.655	0	8.5258	1.1736		8.6414	0	8.5043	1.1715		8.6464	0	8.5187	1.1743		8.6376	0	8.4561	1.2021		8.6298	0	8.3545	1.3265		8.58	0	8.4387	1.3049		8.739	0	8.3895	1.3379
	[Ni(SH2)2]2+	8.4936	1.3916		8.5876	0.0028	8.4761	1.3945		8.5794	0.0022	8.4987	1.3733		8.5894	0.018	8.4858	1.3734		8.5819	0.0151	8.4932	1.3818		8.5819	0.0085	8.479	1.3788		8.5562	-0.0092	8.4313	1.4423		8.5391	-0.0073	8.2921	1.5787		8.4674	0.049	8.338	1.5414		8.6674	0	8.2652	1.6116
	[Ni(SH2)2(SH)]+	8.5085	1.0957		8.5826	0	8.4936	1.0952		8.5382	0	8.5074	1.0542		8.5938	0	8.5007	1.0679		8.5596	0	8.5046	1.0662		8.5662	0	8.5034	1.0644		8.555	0	8.4706	1.1038		8.53	0	8.3525	1.2437		8.4948	0	8.4615	1.2303		8.5422	0	8.3876	1.2564
	[Ni(SH2)3]2+	8.3617	1.2841		8.586	0	8.338	1.3054		8.5812	0	8.4007	1.2581		8.6324	0	8.3914	1.2556		8.6222	0	8.391	1.2528		8.6262	0	8.3828	1.2622		8.617	0	8.3412	1.3522		8.602	0	8.2249	1.4659		8.5752	0	8.1626	1.4762		8.5882	0	8.0994	1.5684
	[Ni(SH2)4]2+	8.3211	1.2893		8.6878	0	8.2912	1.2794		8.6684	0	8.3401	1.2239		8.7126	0	8.3276	1.2556		8.6908	0	8.317	1.265		8.6958	0	8.3195	1.2443		8.687	0	8.2647	1.3033		8.6784	0	8.1645	1.4085		8.6192	0	8.2174	1.5092		8.6826	0	8.1559	1.5299
	[Ni(SH2)5]2+	8.2767	1.3081		8.4422	0	8.2671	1.3137		8.4254	0	8.3159	1.2773		8.4452	0	8.2859	1.2835		8.4364	0	8.2934	1.2806		8.4386	0	8.2858	1.2766		8.4304	0	8.2112	1.3646		8.4114	0	8.165	1.3928		8.3604	0	8.1689	1.3995		8.399	0	8.0354	1.5344
	[Ni(SH2)6]2+	8.3594	1.2538		8.3476	-0.0154	8.3598	1.2778		8.3369	-0.0181	8.4175	1.2261		8.3761	-0.0153	8.424	1.212		8.3726	-0.0084	8.4051	1.2319		8.3658	-0.0226	8.3998	1.2282		8.3656	-0.0106	8.3297	1.2661		8.2863	-0.0349	8.242	1.3532		8.2157	0.0287	8.2617	1.4339		8.4148	0	8.2698	1.4748
	[Ni(SH)3]−	8.4341	1.1599		8.6324	0	8.4133	1.1607		8.5816	0	8.4723	1.1027		8.588	0	8.439	1.1082		8.6024	0	8.4421	1.1275		8.6058	0	8.4232	1.126		8.5966	0	8.3979	1.2003		8.5252	0	8.2918	1.3198		8.46	0	8.3309	1.3661		8.6194	0	8.2856	1.467
		8.3389	1.34834		8.51051	0.0127304	8.31392	1.35135		8.48279	0.0144261	8.34084	1.3349		8.50499	0.0148783	8.33942	1.33676		8.5037	0.0154058	8.33861	1.3389		8.50482	0.015113	8.33346	1.34024		8.49506	0.0155406	8.04451	1.35195		8.4692	0.013713	7.95587	1.43663		8.41454	0.0181884	8.22763	1.48818		8.50875	1.44928e-06	7.94334	1.49584
[truncated: 22 more columns]

## Sheet: S4
	Table S4 dn configuration and number of unpaired electrons in d-shell of Ni(III) complexes obtained by Mulliken population analysis, for various density functionals.
	GGA																														meta-GGA										HYBRID
			OPBE					S12g					BLYP					PW91					BP86					PBE					TPSS					M06-L					b3lyp					PBE0
	HS			LS		HS			LS		HS			LS		HS			LS		HS			LS		HS			LS		HS			LS		HS			LS		HS			LS		HS			LS
[Ni(AcO)]2+	8.0954	1.5626		8.0552	1.0842	8.0832	1.59		8.0786	0.9712	8.1015	1.5945		8.1211	0.9301	8.0982	1.5928		8.0972	0.9656	8.0996	1.5906		8.0964	0.9826	8.0903	1.5955		8.086	0.8059	8.0275	1.6237		8.0407	1.1551	7.9779	1.7001		7.9358	1.4066	8.0226	1.6614		7.9978	1.524	7.8949	1.7599		7.9334
[Ni(CN)]2+	8.2746	1.5842		0	0	8.2617	1.6013		0	0	8.2952	1.574				8.2867	1.5763		0	0	8.2803	1.5867		0	0	8.2771	1.5883		0	0	8.1527	1.6745		0	0	8.123	1.7108				8.1048	1.7512				8.2564	1.5944		0
[Ni(CN)2]+	8.3501	1.4299		8.4709	0.3401	8.3439	1.4349		8.3959	0.4499	8.3576	1.4282		8.4016	0.3042	8.3656	1.4268		8.3903	0.6877	8.3557	1.4365		8.3448	1.0566	8.3586	1.433		8.4508	0.2638	8.3092	1.4996		8.3872	0.345	8.2376	1.5508		8.3205	0.3785	8.2441	1.5831		8.2836	0.1238	8.2393	1.5915		8.2441
[Ni(CN)3]	8.2729	1.4933		8.4111	0.8015	8.2399	1.5049		8.4507	0.6707	8.2584	1.4996		8.4825	0.6075	8.2522	1.5028		8.4613	0.6197	8.2533	1.5021		8.478	0.6204	8.2412	1.5098		8.4698	0.6266	8.2009	1.5569		8.3267	0.8459	8.124	1.6172		8.2559	0.9627	8.1092	1.68		8.2684	1.0088	8.0693	1.7267		8.2546
[Ni(CN)4]−	8.2779	1.4063		8.2363	0.5791	8.261	1.4048		8.2004	0.5604	8.2962	1.3794		8.2488	0.5256	8.2858	1.3856		8.2699	0.5217	8.2907	1.3813		8.2711	0.5251	8.273	1.3946		8.2479	0.5441	8.2308	1.4416		8.1643	0.5817	8.1648	1.5086		8.14	0.6894	8.1327	1.6061		8.0691	0.7789	8.079	1.6718		8.0631
[Ni(CO3)]+	8.336	1.4768		8.4004	0.881	8.3378	1.4844		8.4	0.8982	8.3383	1.4435		8.4126	0.845	8.3334	1.4454		8.4041	0.8553	8.3388	1.4438		8.4051	0.8631	8.3536	1.4734		8.3986	0.8634	8.3021	1.4765		8.371	0.9612	8.145	1.4822		8.2602	1.2342	8.2856	1.5034		8.3263	1.3651	8.2842	1.5388		8.2506
[Ni(CS)]3+	8.0834	1.7892		8.49575	1.31245	8.0772	1.799		8.4903	1.3033	8.0851	1.7853		8.50205	1.31415	8.0796	1.7834		8.49515	1.30125	8.0764	1.784		8.4951	1.3084	8.0153	1.8299		8.4907	1.297	8.045	1.8124		8.47945	1.34285	7.9998	1.8286		8.48	1.3966	7.9981	1.8473		8.46775	1.41445	7.9648	1.8592		8.47835
[Ni(CS)3]3+	8.195	1.6034		8.3001	0.8071	8.1538	1.6278		8.2968	0.7482	8.1931	1.5949		8.3378	0.7102	8.1937	1.5955		8.3219	0.7197	8.1954	1.5936		8.322	0.7242	8.187	1.5996		8.319	0.7206	8.1284	1.659		8.2125	0.8521	8.0455	1.7129		8.187	1.02	8.0582	1.7472		8.2293	1.0463	7.9832	1.7626		8.1994
[Ni(CS)4]3+	8.0961	1.4389		8.2547	0.5903	8.0721	1.4109		8.2416	0.6072	8.1006	1.3848		8.2381	0.5627	8.1315	1.3591		8.2542	0.5864	8.1289	1.3737		8.2604	0.5784	8.1188	1.378		8.2613	0.5937	8.0473	1.4451		8.1986	0.6118	7.9454	1.504		8.1121	0.7305	7.9426	1.633		8.1577	0.7087	7.874	1.714		8.1273
[Ni(en)]3+	8.1757	1.5835		8.2396	0.8062	8.1614	1.579		8.2968	0.8026	8.1848	1.5738		8.2904	0.7742	8.1774	1.5792		8.2841	0.7447	8.1705	1.5723		8.307	0.7846	8.1586	1.5662		8.3108	0.7744	8.1483	1.6063		8.2295	0.9509	8.0682	1.6506		8.1156	1.2506	8.0778	1.6666		8.1194	1.4858	8.0511	1.7439		8.0513
[Ni(en)2]3+	8.0011	1.5377		8.007	0.7846	7.9956	1.534		7.9994	0.7556	8.0403	1.5163		8.0454	0.751	8.0213	1.5035		8.0383	0.7639	8.0284	1.52		8.0383	0.7687	8.0347	1.5069		8.0056	0.7592	7.9454	1.5972		7.9736	0.8362	7.8548	1.6046		7.8278	1.0102	7.8411	1.6597		7.8495	1.0965	7.756	1.7828		7.8469
[Ni(form.)2]3+	8.3192	1.5274		8.3149	1.3477	8.3304	1.505		8.3264	1.3222	8.3389	1.5017		8.315	1.3026	8.3385	1.5051		8.3285	1.2929	8.3391	1.5057		8.3258	1.3046	8.3343	1.5071		8.326	1.2942	8.3009	1.5427		8.2425	1.4329	8.2962	1.5556		8.1548	1.5688	8.3741	1.4911		8.0878	1.6782	8.3838	1.4816		8.0551
[Ni(form.)3]3+	8.0989	1.5139		8.049	0.9816	8.0745	1.5099		8.0624	0.9252	8.0923	1.4695		8.0826	0.8572	8.0844	1.4862		8.0596	0.9146	8.0927	1.4949		8.0551	0.9125	8.0914	1.5074		8.055	0.907	8.0004	1.556		7.9748	1.0172	7.9495	1.6137		7.8123	1.3725	7.9567	1.6501		7.879	1.6294	7.9357	1.6955		7.8593
[Ni(form.)4]3+	7.9177	1.5703		8.1365	0.7657	7.8993	1.5777		8.1489	0.7391	7.9136	1.5434		8.1404	0.7774	7.9206	1.5628		8.1286	0.772	7.9128	1.5474		8.1342	0.7678	7.9166	1.5434		8.1385	0.7601	7.8596	1.5726		8.1047	0.8287	7.8478	1.636		8.0233	1.1263	7.7762	1.7604		8.0079	1.3017	7.7141	1.7977		7.9878
[Ni(NC)]2+	8.1805	1.6361		8.1513	1.7193	8.1982	1.6608		8.1531	1.6987	8.2064	1.6734		8.1617	1.7137	8.202	1.6598		8.1629	1.7111	8.1973	1.6723		8.1407	1.7211	8.1854	1.701		8.1471	1.7149	8.1625	1.7135		8.1016	1.747	8.0816	1.743		8.0583	1.7953	8.0205	1.8435		8.0546	1.8258	8.0233	1.8361		8.0289
[Ni(NC)2]+	8.3179	1.4263		8.5302	-0.0064	8.2879	1.3745		8.5104	0.064	8.3246	1.3914		8.5133	0.0785	8.3403	1.4113		8.5207	0.0359	8.2882	1.416		8.522	0.0218	8.3295	1.4073		8.5161	0.0543	8.2267	1.4783		8.4815	-0.0095	8.1578	1.5634		8.4464	-0.0976	8.1787	1.5993		8.3105	0.7559	8.1221	1.6545		8.3662
[Ni(NC)3]	8.2184	1.5024		8.4264	0.468	8.1832	1.4892		8.3894	0.4556	8.2239	1.4769		8.4108	0.404	8.222	1.4678		8.4132	0.4054	8.2361	1.4821		8.4124	0.4084	8.2144	1.483		8.4078	0.412	8.1587	1.5303		8.339	0.4012	8.0459	1.6095		8.2732	0.4816	7.9893	1.6873		8.0876	1.446	7.8866	1.767		8.212
[Ni(NC)4]−	8.1313	1.5729		8.3642	0.666	8.1167	1.5653		8.527	-0.02	8.1321	1.5689		8.3526	0.5658	8.1464	1.5544		8.3684	0.5982	8.1366	1.5622		8.3628	0.5822	8.136	1.5594		8.3713	0.5869	8.036	1.616		8.2729	0.7265	7.9561	1.6757		8.1444	0.9766	7.8849	1.7605		8.1099	1.0307	7.8061	1.8149		8.085
[Ni(NCS)]2+	8.561	1.3188		8.5982	-0.4954	8.5631	1.3077		8.6023	-0.4963	8.5723	1.3015		8.6131	-0.4981	8.5822	1.293		8.5916	-0.4898	8.5827	1.2917		8.5949	-0.4799	8.5586	1.3156		8.586	-0.5084	8.5733	1.2989		8.597	-0.4876	8.5482	1.316		8.5981	-0.5181	8.6394	1.2534		8.6728	-0.6328	8.6429	1.2535		8.6702
[Ni(NCS)2]+	8.4635	1.2403		8.4703	0.8377	8.4443	1.2363		8.4056	0.6342	8.5013	1.1929		8.457	0.6994	8.5112	1.2058		8.4488	0.7228	8.5077	1.2003		8.4009	0.5757	8.485	1.1956		8.4525	0.7211	8.4649	1.2175		8.3473	0.7897	8.427	1.2534		8.3385	1.0929	8.4871	1.2657		8.2771	1.3379	8.4744	1.2988		8.2191
[Ni(H2O)(NH3)2]3+	7.9699	1.7355		8.178	1.0156	7.961	1.725		8.1648	1.0144	8.0144	1.696		8.1799	0.9889	8.0098	1.7006		8.184	0.9954	8.0112	1.6988		8.1842	1.0038	7.9893	1.7165		8.1811	0.9961	7.9598	1.749		8.1357	1.0553	7.8856	1.7858		8.0503	1.2139	7.846	1.7428		8.0457	1.2983	7.8155	1.8041		8.0052
[Ni(H2O)(SH2)2]3+	8.2089	1.5215		8.2592	1.218	8.1992	1.5396		8.2815	1.1981	8.1911	1.5139		8.3034	1.1346	8.1755	1.5135		8.2875	1.1583	8.185	1.52		8.2679	1.1571	8.1787	1.5017		8.2905	1.1595	8.1355	1.5485		8.2057	1.2743	8.1127	1.6483		8.13	1.4508	8.0859	1.6625		8.0527	1.5051	8.034	1.7006		8.0425
[Ni(H2O)2(NH3)2]3+-cis	8.0178	1.7326		8.0647	0.8107	8.0043	1.7213		8.0573	0.8275	8.0533	1.6899		8.0931	0.7797	8.0496	1.7132		8.0912	0.7778	8.0603	1.7011		8.0947	0.7767	8.0432	1.7162		8.0944	0.7686	7.9895	1.7533		7.9884	0.8302	7.8771	1.8113		7.869	0.9454	7.8687	1.8377		7.9427	1.0301	7.7894	1.9112		7.9355
[Ni(H2O)2(NH3)2]3+-trans	7.8795	1.7007		8.0654	0.9488	7.8743	1.7031		8.0597	0.9327	7.8992	1.6536		8.077	0.8908	7.9154	1.673		8.0666	0.917	7.9159	1.6715		8.0678	0.9254	7.9087	1.6773		8.0531	0.9207	7.8851	1.7141		8.0139	0.9637	7.7985	1.7877		7.9187	1.0971	7.7808	1.803		7.968	1.0906	7.6891	1.8767		7.915
[Ni(NH3)(SH2)2]3+	8.2738	1.5022		8.2278	1.0634	8.2489	1.4973		8.2448	1.0852	8.2464	1.4478		8.2629	1.0503	8.2391	1.4557		8.2712	1.0752	8.254	1.4668		8.2593	1.0949	8.2521	1.4635		8.2703	1.0723	8.2288	1.4948		8.1919	1.1889	8.1513	1.6097		8.0554	1.4542	8.2182	1.5712		8.0743	1.4971	8.0977	1.5953		8.0372
[Ni(NH3)3(SH2)]3+	8.0303	1.5789		8.1302	0.9948	8.0123	1.6173		8.1091	0.9977	8.0229	1.6005		8.1388	0.9366	8.025	1.576		8.1203	0.9737	8.0462	1.59		8.1167	0.9789	8.0344	1.5988		8.1107	0.9797	7.9565	1.6337		8.0964	1.029	7.9145	1.6693		8.0239	1.0993	7.9439	1.7179		8.0301	1.1281	7.8778	1.743		8.0308
[Ni(CH3)2]+	8.2925	1.4403		8.4445	0.8213	8.2566	1.4486		8.42	0.8486	8.2504	1.4348		8.428	0.831	8.2672	1.439		8.4406	0.8474	8.2881	1.4377		8.4336	0.8422	8.2732	1.4384		8.4283	0.8445	8.2375	1.4399		8.3996	0.8858	8.1457	1.5057		8.3756	1.011	8.2342	1.4084		8.409	1.008	8.2094	1.4356		8.4376
[Ni(CO)3]3+	8.1428	1.7358		8.2513	1.0091	8.1217	1.7491		8.2409	1.0141	8.1432	1.725		8.2395	1.0075	8.1444	1.7318		8.2399	1.0101	8.145	1.7294		8.2415	1.0135	8.1379	1.7379		8.246	1.0022	8.0789	1.7797		8.1931	1.0441	8.0068	1.8416		8.1252	1.1748	7.9818	1.8452		8.1195	1.1791	7.9421	1.8937		8.11
[Ni(CO)4]3+	8.1916	1.6486		8.2957	0.9451	8.1666	1.66		8.2851	0.9785	8.1833	1.6401		8.2869	0.9785	8.1901	1.6399		8.2928	0.9772	8.1899	1.6383		8.3029	0.9681	8.1851	1.6441		8.2893	0.9783	8.0909	1.7133		8.2145	1.0089	8.046	1.7622		8.2046	1.0668	7.9804	1.8208		8.2257	1.0563	7.9026	1.8714		8.1976
[Ni(CO)5]3+	8.0588	1.7478		8.3709	0.7501	8.0022	1.7562		8.3331	0.7635	8.0756	1.7256		8.3686	0.7324	8.0358	1.7448		8.3683	0.7357	8.0186	1.7296		8.3733	0.7335	8.0061	1.7453		8.3649	0.7349	7.976	1.8232		8.2994	0.7824	7.8839	1.8801		8.197	0.9104	7.8995	1.8511		8.2561	0.9005	7.8603	1.9139		8.2148
[Ni(CO)6]3+	8.06431	1.72129		8.4657	0.5693	8.09219	1.7394		8.3909	0.5645	8.12702	1.70938		8.4248	0.5564	8.10261	1.69419		8.4529	0.5519	8.09085	1.71015		8.445	0.5498	8.09558	1.72922		8.4481	0.5473	8.06321	1.7562		8.3919	0.6223	7.99445	1.80855		8.3018	0.7508	8.06551	1.78668		8.3493	0.8347	8.02822	1.81998		8.2916
[Ni(H2O)2]3+	8.0337	1.7527		8.1157	1.7179	8.0207	1.7449		8.1237	1.6929	8.0567	1.7143		8.1302	1.6746	8.0461	1.7263		8.1286	1.6858	8.0545	1.7201		8.1249	1.6923	8.0475	1.7233		8.0407	1.7563	8.0447	1.7497		8.0772	1.754	8.0022	1.7938		8.0141	1.8269	8.0396	1.7318		8.0048	1.8556	7.9951	1.7333		7.9856
[Ni(H2O)3]3+	8.0112	1.7684		8.0392	0.8702	7.9782	1.7444		8.022	0.8064	7.9776	1.7224		8.0503	0.7593	8.0024	1.733		8.0368	0.7622	8.004	1.765		8.0382	0.7698	7.9897	1.7511		8.0336	0.7592	7.9572	1.8108		7.9707	1.1037	7.891	1.8576		7.8534	1.2828	7.8585	1.8625		7.8825	1.3443	7.8299	1.9183		7.8586
[Ni(H2O)4]3+	7.8505	1.7585		7.9961	0.8271	7.8311	1.7743		7.9988	0.7742	7.8694	1.7782		8.0095	0.7527	7.876	1.7696		8.0083	0.7501	7.8782	1.7666		8.0106	0.7534	7.869	1.7724		8.0235	0.7507	7.8206	1.7818		7.9405	0.8427	7.7715	1.8403		7.8392	1.0002	7.7019	1.8903		7.8076	1.0596	7.597	1.9158		7.7437
[Ni(H2O)5]3+	7.8566	1.725		7.9398	0.7498	7.8215	1.7313		7.918	0.7598	7.8937	1.7441		7.9652	0.7386	7.8694	1.7254		7.9587	0.7303	7.8828	1.7388		7.9529	0.7251	7.861	1.7276		7.9434	0.7234	7.788	1.787		7.8892	0.7454	7.7363	1.8063		7.8233	0.8985	7.6696	1.8866		7.7728	0.9052	7.5619	1.9399		7.7453
[Ni(H2O)6]3+	7.8148	1.82		7.994	0.7766	7.8083	1.8401		7.9675	0.7667	7.8441	1.8079		8.0039	0.7503	7.8667	1.8151		8.0017	0.7631	7.8564	1.8242		8.0015	0.7649	7.8402	1.8412		7.9959	0.7671	7.8096	1.8454		7.9793	0.8119	7.7377	1.8441		7.8988	0.9138	7.6844	1.9708		7.8856	0.8736	7.6083	1.9827		7.7901
[Ni(NH2)]2+	8.2305	1.6749		8.2864	1.5752	8.2102	1.6876		8.2892	1.555	8.221	1.6808		8.2987	1.5351	8.2234	1.6802		8.2911	1.5529	8.2221	1.6805		8.2841	1.5625	8.2214	1.681		8.2895	1.5529	8.1854	1.7156		8.2347	1.6251	8.1393	1.7443		8.1435	1.6983	8.1516	1.7516		8.1693	1.7207	8.1298	1.7724		8.1226
[Ni(NH2)2]+	8.4087	1.3005		8.477	0.831	8.3998	1.2832		8.4443	0.8155	8.4174	1.272		8.4506	0.7976	8.4284	1.2678		8.4571	0.7991	8.4143	1.2797		8.4491	0.8051	8.4112	1.2816		8.4531	0.8009	8.3991	1.2495		8.4088	0.8892	8.3603	1.2657		8.2927	1.1327	8.4436	1.2714		8.3323	1.2195	8.4494	1.2498		8.2747
[Ni(NH3)(NH2)]2+	8.2001	1.5043		8.1709	1.4375	8.1939	1.5311		8.1598	1.4192	8.2035	1.5251		8.1608	1.3846	8.2016	1.5196		8.1788	1.389	8.1918	1.5128		8.1892	1.3896	8.1964	1.5232		8.2697	0.6851	8.1308	1.559		8.1342	1.457	8.053	1.6572		8.051	1.6098	8.1019	1.6461		8.1955	0.8589	8.052	1.6914		8.0319
[Ni(NH3)2(NH2)]2+	8.0907	1.6109		8.369	0.287	8.0303	1.6167		8.3652	0.3152	8.0413	1.5999		8.3916	0.3102	8.0559	1.6127		8.4045	0.3103	8.0616	1.611		8.4064	0.3056	8.048	1.6148		8.395	0.3192	8.0272	1.6338		8.3382	0.3108	7.9487	1.6509		8.3134	0.2546	7.9866	1.669		8.3834	0.1974	8.0074	1.7114		8.3767
[Ni(NH3)3]3+	8.0517	1.7281		8.1002	0.996	8.0139	1.7483		8.0976	0.9878	8.0619	1.7051		8.0874	0.9856	8.0367	1.6833		8.1216	0.977	8.0178	1.6602		8.0944	0.9866	8.038	1.6994		8.1223	0.9777	7.9936	1.7306		8.0447	1.0437	7.9464	1.7856		7.9935	1.1239	7.9428	1.756		7.9446	1.145	7.9181	1.8141		7.9547
[Ni(NH3)4]3+	7.9936	1.7082		8.0947	1.0055	7.9675	1.6741		8.078	0.9864	8.0363	1.6653		8.123	0.9432	8.0213	1.7023		8.1043	0.9463	8.0135	1.6721		8.1093	0.9531	8.0034	1.6602		8.1135	0.9701	7.9651	1.7117		8.0665	0.9801	7.8875	1.7695		7.9963	1.0447	7.9129	1.8053		8.0419	1.0771	7.8392	1.856		8.0325
[Ni(NH3)5]3+	7.9301	1.6783		8.3156	0.6784	7.8848	1.6668		8.2833	0.6815	7.9848	1.6328		8.3058	0.6638	7.9496	1.6512		8.3039	0.6691	7.9575	1.6575		8.3059	0.6697	7.9471	1.6657		8.2986	0.6712	7.9062	1.702		8.2527	0.7063	7.8249	1.7747		8.1635	0.7977	7.7817	1.8083		8.1654	0.7816	7.7408	1.8764		8.1073
[Ni(NH3)6]3+	7.9813	1.7061		8.2163	0.6349	7.977	1.7292		8.1829	0.6485	8.0158	1.7156		8.2077	0.6435	8.0184	1.7316		8.2211	0.6375	8.0181	1.7297		8.2228	0.6384	8.0095	1.7353		8.2068	0.6292	7.9444	1.7808		8.1564	0.682	7.8466	1.8336		8.0648	0.746	7.8496	1.8702		8.1243	0.7661	7.7267	1.8749		8.0621
[Ni(OH)]2+	8.183	1.6902		8.2275	-0.0407	8.1623	1.6955		8.228	0.0362	8.1652	1.7094		8.22	0.1002	8.1641	1.7131		8.2184	0.0832	8.1648	1.7112		8.2152	0.0572	8.1711	1.7045		8.218	0.0894	8.141	1.7234		8.1981	0.0145	8.11	1.7484		8.1705	-0.0563	8.1273	1.7349		8.1436	-0.1366	8.0682	1.8028		8.1202
[Ni(OH)(H2O)]2+	8.189	1.5936		8.2455	0.0305	8.1729	1.5859		8.2344	0.0528	8.1987	1.5649		8.2188	0.0314	8.1985	1.5719		8.2296	0.0414	8.2035	1.5699		8.2336	0.0376	8.1918	1.5752		8.2152	0.0352	8.1781	1.5809		8.1942	0.009	8.1367	1.6011		8.1907	-0.0223	8.1148	1.617		8.1438	0.4154	8.0872	1.6264		8.1642
[Ni(OH)(H2O)2]2+	7.9807	1.6047		8.167	0.5042	7.9696	1.6054		8.129	0.4984	7.979	1.6098		8.1196	0.6064	7.9726	1.6006		8.1101	0.5985	7.9858	1.5902		8.1114	0.6014	7.9687	1.5995		8.1084	0.6008	7.9547	1.6357		8.0639	0.6591	7.8883	1.6665		8.0533	0.3899	7.8898	1.7154		8.0663	0.4511	7.9122	1.7512		8.0471
[Ni(OH)(H2O)3]2+	7.9472	1.6608		8.1209	0.5207	7.9057	1.6677		8.1193	0.5453	7.9467	1.6619		8.0868	0.526	7.9502	1.665		8.1328	0.5462	7.951	1.6616		8.1252	0.5366	7.9454	1.6692		8.1221	0.5431	7.8931	1.6841		8.0457	0.5713	7.8136	1.7348		7.9361	0.5951	7.8652	1.7384		7.9995	0.5069	7.854	1.7392		8.0005
[Ni(OH)2]+	8.2382	1.4974		8.3217	0.8273	8.2199	1.4913		8.309	0.8018	8.2467	1.4713		8.3144	0.7684	8.247	1.4782		8.3198	0.774	8.2491	1.4753		8.3183	0.7829	8.2402	1.4818		8.3165	0.7739	8.2274	1.4946		8.2716	0.8834	8.1561	1.5037		8.1506	1.2038	8.1659	1.5733		8.3478	0.3404	8.1231	1.6071		8.1109
[Ni(OH)3]	8.0181	1.5821		8.2289	0.6229	7.9994	1.592		8.1815	0.6303	8.0406	1.5836		8.2095	0.6147	8.0304	1.5758		8.2127	0.6217	8.0417	1.5839		8.2042	0.6332	8.0325	1.5901		8.1995	0.6353	7.9536	1.6348		8.1609	0.6617	7.8446	1.6748		8.0925	0.7435	7.8763	1.7751		8.0844	0.7776	7.8171	1.7883		8.0218
[Ni(OH)4]−	7.8231	1.7419		7.9889	0.6731	7.8023	1.7375		7.9426	0.6678	7.8508	1.735		7.9779	0.6291	7.8355	1.7233		7.9894	0.6522	7.8377	1.7287		7.9884	0.6554	7.8301	1.7293		7.9811	0.6529	7.7777	1.7759		7.9461	0.7013	7.7154	1.8234		7.8705	0.7595	7.6904	1.851		7.9197	0.7635	7.6302	1.8886		7.8416
[Ni(PH2)]2+	8.3487	1.5181		8.5547	1.2997	8.3314	1.5358		8.5531	1.2867	8.3299	1.5363		8.5795	1.2311	8.3329	1.5289		8.5674	1.256	8.3318	1.5308		8.5632	1.2656	8.3299	1.5413		8.5627	1.2613	8.2949	1.6021		8.5179	1.3285	8.2299	1.6307		8.4279	1.4385	8.2228	1.6532		8.531	1.3674	8.1897	1.6883		8.4657
[Ni(PH2)2]+	8.6057	1.0517		8.8319	0.4429	8.4188	1.2218		8.8138	0.4694	8.5297	1.0895		8.8611	0.4583	8.5387	1.0823		8.8406	0.4372	8.546	1.0776		8.8448	0.432	8.5209	1.0971		8.8334	0.4446	8.467	1.0962		8.8303	0.4445	8.4331	1.1963		8.772	0.6102	8.6951	0.9583		8.785	0.6996	8.5327	1.0571		8.7443
[Ni(PH2)3]	8.5828	0.8902		8.7071	0.3881	8.5604	0.9158		8.6915	0.3865	8.5739	0.8573		8.7287	0.3509	8.6002	0.8796		8.7211	0.3625	8.6046	0.8744		8.7255	0.3607	8.5801	0.9001		8.7223	0.3583	8.5663	0.8849		8.6957	0.3711	8.4443	0.9359		8.66	0.4666	8.5984	0.981		8.7548	0.5074	8.4989	1.0525		8.6925
[Ni(PH3)(PH2)]2+	8.217	1.5328		8.6757	0.4965	8.2121	1.5209		8.6541	0.5195	8.242	1.474		8.6733	0.5467	8.2294	1.5044		8.6681	0.5017	8.214	1.5314		8.6815	0.5075	8.2257	1.5115		8.6709	0.5155	8.1357	1.6393		8.6447	0.5449	8.0586	1.7028		8.5528	0.7544	8.0714	1.6968		8.6494	0.6784	8.0506	1.7294		8.6028
[Ni(PH3)2(PH2)]2+	8.2745	1.4039		8.5965	0.4077	8.2393	1.3797		8.5656	0.4446	8.2436	1.363		8.5975	0.4055	8.2685	1.3477		8.57	0.4156	8.2695	1.3649		8.5858	0.405	8.2712	1.3594		8.5739	0.4143	8.2055	1.4239		8.5553	0.4035	8.1676	1.4844		8.5225	0.4893	8.203	1.485		8.5753	0.4079	8.1362	1.5434		8.5747
[Ni(PH3)3]3+	8.3154	1.4194		8.3545	0.9053	8.2875	1.4399		8.3451	0.9109	8.311	1.4242		8.4103	0.8555	8.3056	1.4326		8.3904	0.8952	8.3189	1.4315		8.4056	0.8838	8.291	1.4288		8.3951	0.8877	8.2549	1.4657		8.3304	0.9774	8.1889	1.5437		8.2281	1.1415	8.2784	1.4844		8.3278	1.15	8.2637	1.4833		8.2912
[Ni(PH3)4]3+	8.3365	1.2897		8.336	1.014	8.3422	1.3308		8.3029	1.0231	8.4087	1.2695		8.3495	0.9789	8.3946	1.2704		8.3539	0.9853	8.3965	1.2761		8.3604	0.9834	8.3821	1.2813		8.3486	0.9918	8.3367	1.3097		8.3001	1.0135	8.2166	1.3862		8.2584	1.1002	8.2784	1.433		8.362	1.0526	8.1633	1.4209		8.3516
[Ni(PH3)5]3+	8.2338	1.2998		8.4028	0.5238	8.2304	1.319		8.3947	0.5237	8.2474	1.23		8.4248	0.517	8.222	1.2368		8.423	0.4794	8.2257	1.2279		8.4255	0.4791	8.2079	1.2473		8.4219	0.4901	8.1782	1.3006		8.3709	0.5537	8.0578	1.4254		8.3251	0.6643	8.1774	1.4374		8.3238	0.686	8.0416	1.5232		8.2662
[Ni(SH)]3+	8.3973	1.4989		8.3454	1.4996	8.3874	1.5082		8.338	1.5064	8.382	1.4986		8.3717	1.4747	8.3916	1.5098		8.3549	1.4883	8.3887	1.5131		8.3558	1.4894	8.3774	1.5044		8.3591	1.4823	8.3562	1.5468		8.2947	1.5677	8.3	1.5898		8.1927	1.6359	8.278	1.5854		8.1888	1.6756	8.2264	1.6258		8.1495
[Ni(SH)2]+	8.5814	1.27		8.5839	0.8949	8.5525	1.2817		8.5606	0.901	8.5767	1.2401		8.5835	0.8589	8.5786	1.2534		8.5729	0.8717	8.5811	1.2533		8.5749	0.8807	8.5661	1.2595		8.5674	0.8752	8.5348	1.3024		8.4991	0.9983	8.4246	1.4082		8.3244	1.3092	8.5544	1.2966		8.3697	1.3767	8.547	1.3076		8.2955
[Ni(SH2)(SH)]2+	8.4051	1.3879		8.5458	0.4004	8.3892	1.4004		8.5469	0.4637	8.3968	1.3938		8.5899	0.4465	8.3979	1.3761		8.5893	0.4549	8.3946	1.376		8.5998	0.4646	8.3872	1.3784		8.5939	0.4711	8.3513	1.4303		8.5511	0.4987	8.2675	1.5249		8.5171	0.7103	8.2834	1.5318		8.6164	0.278	8.1733	1.5439		8.5774
[Ni(SH2)2]3+	8.5461	1.3619		8.3771	1.3433	8.5448	1.3804		8.3689	1.3475	8.5602	1.3676		8.4016	1.2778	8.5601	1.3697		8.3977	1.3107	8.5533	1.3563		8.3857	1.3115	8.5523	1.3757		8.3931	1.3133	8.5298	1.37		8.3213	1.4153	8.5062	1.4134		8.223	1.5934	8.634	1.2988		8.2278	1.6134	8.6312	1.268		8.1645
[Ni(SH2)2(SH)]2+	8.2732	1.4196		8.4814	0.457	8.2659	1.3867		8.464	0.5044	8.282	1.3566		8.5096	0.4542	8.2689	1.3779		8.5003	0.4835	8.2801	1.3835		8.5033	0.4837	8.2628	1.383		8.4999	0.5029	8.2309	1.4639		8.4744	0.5444	8.1334	1.5082		8.3064	1.0058	8.1848	1.4822		8.4745	0.1925	8.1091	1.5261		8.3643
[Ni(SH2)3]3+	8.3422	1.405		8.2937	1.0627	8.346	1.4164		8.2857	1.0381	8.3594	1.4034		8.3533	0.9487	8.3488	1.4074		8.3346	1.0208	8.3485	1.4227		8.3555	1.0263	8.3338	1.4194		8.3417	1.0329	8.2761	1.4591		8.2603	1.1371	8.2397	1.5235		8.1585	1.3617	8.2708	1.4208		8.2156	1.3694	8.2537	1.4913		8.1638
[Ni(SH2)4]3+	8.2845	1.4245		8.3831	0.7443	8.3235	1.4231		8.3758	0.7484	8.3523	1.3437		8.3766	0.703	8.3526	1.366		8.3878	0.7096	8.3541	1.3635		8.39	0.7122	8.3366	1.3784		8.3918	0.7228	8.268	1.4222		8.3121	0.7875	8.1594	1.4588		8.2374	1.0554	8.2493	1.5207		8.2563	1.0365	8.1347	1.5065		8.2044
[Ni(SH2)5]3+	8.2514	1.329		8.3213	0.6397	8.2624	1.3192		8.3164	0.6508	8.3132	1.2764		8.3828	0.568	8.3045	1.2951		8.3553	0.5867	8.2914	1.2812		8.3582	0.5856	8.2741	1.2973		8.3483	0.5979	8.218	1.362		8.3159	0.6833	8.1468	1.4676		8.2107	0.8409	8.2102	1.3906		8.2081	0.8501	8.1073	1.4883		8.1692
[Ni(SH2)6]3+	8.2169	1.3179		8.4187	0.5757	8.2165	1.3237		8.4155	0.5515	8.265	1.266		8.4621	0.4767	8.2453	1.2955		8.4713	0.5089	8.2515	1.2903		8.4661	0.4979	8.255	1.3044		8.4544	0.5246	8.2182	1.3054		8.4194	0.5894	8.1664	1.3932		8.3097	0.7149	8.2485	1.3855		8.3849	0.7703	8.1183	1.4231		8.312
[Ni(SH)3]	8.3652	1.2796		8.4896	0.4848	8.3324	1.289		8.4474	0.4806	8.4024	1.2148		8.4943	0.4289	8.3818	1.2532		8.5006	0.4602	8.3837	1.2509		8.502	0.4404	8.361	1.2518		8.4927	0.4503	8.3003	1.2785		8.4594	0.492	8.2174	1.4062		8.3919	0.6265	8.2985	1.3503		8.3995	0.7387	8.2368	1.4094		8.3478
	8.18706	1.52878		8.18522	0.775688	8.16864	1.5347		8.17503	0.761062	8.19697	1.51065		8.31488	0.754536	8.19484	1.51465		8.1925	0.757491	8.19502	1.51587		8.19164	0.762319	8.1861	1.52188		8.19036	0.742397	8.1412	1.55905		8.13771	0.817634	8.07219	1.61337		8.18038	0.963444	8.09594	1.6234		8.20287	0.982742	8.04419	1.65998		8.04754
[truncated: 21 more columns]

## Sheet: S5
	Table S5 DEHS-LS (vertical) calculations on Ni2+ and Ni3+ ions (atoms)
	energies are in kcal/mol
			Ni2+	Ni3+		Ni(II) error	Ni(III) error	MAD
	GGA	OPBE	27.11	60.19		15.39	0.69	8.04
		S12g	26.53	58.93		15.97	0.57	8.27
		BLYP	23.52	52.45		18.98	7.05	13.015
		PW91	23.72	52.8		18.78	6.7	12.74
		BP86	24.02	53.47		18.48	6.03	12.255
		PBE	23.9	53.2		18.6	6.3	12.45
	metaGGA	TPSS	24.96	55.44		17.54	4.06	10.8
		M06-L	32.89	72.42		9.61	12.92	11.265
	HYBRID	B3LYP	49.24	105.56		6.74	46.06	26.4
		PBE0	56.34	120.12		13.84	60.62	37.23
		X3LYP	51.64	110.46		9.14	50.96	30.05
		B1LYP	56	119.35		13.5	59.85	36.675
		B3LYP*	42.68	92.12		0.18	32.62	16.4
	metaHYBRID	TPSSH	37.66	81.85		4.84	22.35	13.595
		M06	57.31	121.58		14.81	62.08	38.445
		exp.	42.5	59.5

## Sheet: S6 (Ni2 2000K)
Table S6 Variation of DEHS-LS as we increase F0 parameter, for Ni(II) complexes, with new, DFTB+U, Hamiltonian. MAE are also provided. F0 is expressed in
S6
F0	0	0.005	0.01	0.015	0.02	0.025	0.03	0.035	0.04	0.045	0.05	OPBE
[Ni(AcO)]+	-24.3266	-22.2871	-19.6992	-17.0515	-14.6971	-12.9132	-12.0014	-12.1779	-13.228	-11	-10.8279	2.31
[Ni(CN)]+	-10.8279	-6.62488	-2.44226	1.5409	5.22858	8.66539	11.9922	15.2474	18.0271	19.3452		4.33
[Ni(CN)2]	-34.957	-30.3991	-25.1479	-19.7218	-14.4059	-9.30447	-4.42284	0.223185	4.52998	8.29401		-5.95
[Ni(CN)3]−	-30.7049	-29.8098	-27.2066	-24.2149	-21.3778	-18.9	-16.8159	-15.0851	-13.6535	-12.4919	-11.6179	-17.39
[Ni(CN)4]2−	-62.8604	-59.0028	-54.7518	-50.8724	-47.5263	-44.6785	-42.217	-40.0064	-37.9152	-35.8251	-33.6313	-28.31
[Ni(CO3)]	-26.866	-26.2399	-24.0419	-21.3049	-18.738	-16.8279	-15.8372	-15.4654	-14.826	-12.9894		-7.31
[Ni(CS)]2+	-11.7265	-9.18472	-6.73794	-4.46452	-2.42674	-0.647386	0.931166	2.46653	4.18643			7.37
[Ni(CS)2]2+	-11.6366	-9.7577	-7.15198	-4.51658	-1.98896	0.427767	2.5	5.15141	7.68838	10.5368		4.6
[Ni(CS)3]2+	-40.9365	-42.0039	-41.7332	-41.0558	-40.359	-39.787	-39.368	-39.079	-38.8777			-19.99
[Ni(en)]2+	-29.2671	-26.6607	-23.5071	-20.2545	-17.2337	-14.6548	-12.6388	-11.3184	-10.8826	-11.3486		1.98
[Ni(en)2]2+	-64.9246	-61	-58.9579	-55.3636	-52.06	-49.2365	-46.9167	-44.9704	-43.1062	-40.8989	-37.8764	-15.67
[Ni(form.)]2+	-1.33126	0.363553	1.8906	3.2413	4.41494	5.4738	6.62281	8.21882	10.3046			7.74
[Ni(form.)2]2+	2.80525	4.94023	6.6413	7.76549	8.0642	7.03914	4.44698	0.930423	-2.57343	-5.5205		8
[Ni(form.)3]2+	-28.4619	-27.0863	-24.9937	-22.689	-20.4241	-18.3018	-16.3256	-14.4967	-12.8937			6.69
[Ni(form.)4]2+	-45.3416	-45.6393	-45.1242	-44.3903	-43.7184	-43.2219	-42.9231					0.54
[Ni(NC)]+	-3.84934	-0.333973	3.17018	6.54047	9.72191	12.7197	15.47	17.527				3.48
[Ni(NC)2]	6.28726	8.57295	10.6982	12.3713	13.2277	12.9783	11.9475	10.7525	9.68711	8.743	7.81099	8.45
[Ni(NC)3]−	-26.5959	-25.5013	-23.801	-22.0546	-20.5337	-19.3429	-18.4866	-17.9206	-17.6009	-17.5087	-17.6751	1.99
[Ni(NC)4]2−	-59.9208	-57.4037	-54.8077	-52.5581	-50.793	-49.4971	-48.5712	-47.8808	-47.2865	-46.6593	-45.882	-7.57
[Ni(NCS)]+	7.67553	8.31091	9.08308	9.88435	10.5687	11.0205	11.3327	11.7877				7.83
[Ni(NCS)2]	1.60967	2.93916	4.79203	6.29939	7.55116	8.7458	9.97595	11.1577	12.1343	12.8166	13.1941	7.23
[Ni(H2O)(NH3)]2+	-3.81841	-0.914629	2.12028	5.16881	8.21306	11.2419	13.442	11.4751	6.77739	3.39963	1.66458	8.84
[Ni(H2O)(NH3)2]2+	-28.0545	-25.1499	-22.2208	-19.579	-17.3956	-15.7367	-14.5892	-13.8836	-13.5173	-13.3902	-13.4429	7.33
[Ni(H2O)(SH2)]2+	4.17669	6.73432	8.89086	10.4565	11.1381	10.7542	9.5352	8.08406	7.00432	6.64307	6.98782	9.33
[Ni(H2O)(SH2)2]2+	-19.0437	-16.7366	-14.3518	-12.2181	-10.5314	-9.40844	-8.88596	-8.92757	-9.44352	-10.3208	-11.452	4.65
[Ni(H2O)2(NH3)]2+	-23.6988	-20.7114	-17.844	-15.319	-13.2334	-11.5894	-10.3236	-9.33275	-8.50378	-7.74807	-7.03008	10.56
[Ni(H2O)2(NH3)2]2+-cis	-56.5075	-53.1604	-49.9226	-47.2114	-45.24	-44.1023	-43.8065	-44.2799	-45.3443	-46.6658	-47.7211	4.07
[Ni(H2O)2(NH3)2]2+-trans	-57.3716	-53.8446	-50.3653	-47.3952	-45.1731	-43.8073	-43.3131	-43.62	-44.5489	-45.7624	-46.734	1.61
[Ni(H2O)2(SH2)]2+	-20.2824	-17.7296	-15.1941	-12.8806	-10.9229	-9.38099	-8.24212	-7.44414	-6.91071	-6.58147	-6.43394	8.96
[Ni(NH3)(SH2)]2+	-2.38137	-1.34967	0.0426196	1.69068	3.57568	5.81136	8.58421	11.8099	9.33051	2.67164	-1.50493	7.75
[Ni(NH3)(SH2)2]2+	-23.537	-22.9961	-21.2727	-19.1542	-17.0652	-15.2591	-13.8712	-12.9398	-12.4389	-12.3279	-12.5947	4.49
[Ni(NH3)2(SH2)]2+	-48.0017	-42.381	-36.861	-31.8294	-27.2996	-23.1897	-19.4135	-15.9189	-12.7091	-9.84105	-7.39283	-6.1
[Ni(NH3)3(SH2)]2+	-52.1385	-49.3989	-46.0187	-42.715	-39.8332	-37.5558	-35.9426	-34.9301	-34.3228	-33.804	-32.99	-3.29
[Ni(CH3)]+	-20.5112	-11.4135	-3.43268	3.34155	8.92158	13.5559	17.4344	19.9781	13.8255	10.3916	8.72014	-1.89
[Ni(CH3)2]	-51.0401	-42.3433	-32.3824	-22.2902	-12.5537	-3.53424	4.40868	10.9321	15.8055	18.9339	20.2914	-11.37
[Ni(CO)]2+	-6.92863	-4.60388	-2.52721	-0.773131	0.585748	1.53508	2.17558	2.7529	3.65602	5.27182		12.69
[Ni(CO)2]2+	-20.8138	-16.6787	-12.3583	-8.72056	-5.58707	-2.8244	-0.284739	2.23603	4.9793	8.1602	11.8713	9.08
[Ni(CO)3]2+	-46.3656	-43.7462	-40.879	-38.3571	-36.4038	-35.0673	-34.3041	-34.0188	-34.0936	-34.4156	-34.8962	-1.76
[Ni(CO)4]2+	-62.1237	-60.1377	-57.9677	-55.9422	-54.2308	-52.8846	-51.8689	-51.0931	-50.4375	-49.773	-48.9759	-19.19
[Ni(CO)5]2+	-39.4841	-40.0912	-41.3731	-43.6226	-46.9285	-51.259	-56.533	-62.6908	-69.7529			-14.84
[Ni(CO)6]2+	6.04442	8.46198	11.1195	13.7943	16.3698	18.7472	20.7733	22.1712	21.7721			11.74
[Ni(H2O)]2+	8.49256	8.88644	9.2435	9.48153	9.59909	9.74067	10.2612	11.6704	14.0144			14.15
[Ni(H2O)2]2+	6.3208	7.3	8.27698	9.98618	12.0242	13.8122	13.1545	8.58811	4.03118	1.23867	-0.0222905	12.61
[Ni(H2O)3]2+	-10.9822	-8.98894	-7.08709	-5.44214	-4.09576	-3.02776	-2.20144	-1.59429	-1.20894	-1.06488	-1.17781	10.46
[Ni(H2O)4]2+	-43.1458	-40.5308	-38.3769	-36.8825	-36.1259	-36.101	-36.7044	-37.6858	-38.6198	-38.989	-38.3585	12.85
[Ni(H2O)5]2+	-19.8647	-18.5389	-17.6959	-17.4735	-17.9238	-19.0677	-20.8979	-23.3741	-26.4936	-30.3135	-34.6103	13.86
[Ni(H2O)6]2+	10.5873	13.6617	16.3952	18.8335	20.9996	22.7896	23.1898	20.8857	17.0098	12.9909		16.03
[Ni(NH2)]+	6.2131	6.1369	5.9614	5.46529	4.40068	2.80425	1.15221	-0.0325272	-0.617793	-0.888931	-1.31006	6.56
[Ni(NH2)2]	-14.1858	-20.7967	-20.6371	-18.4831	-16.099	-14.0495	-12.5538	-11.6192	-11.1275	-10.9275	-10.8787	2.18
[Ni(NH3)]2+	-8.87783	-5.24959	-1.92856	0.992899	3.43961	5.46682	7.38009	9.71402	12.733	16.0184		8.61
[Ni(NH3)(NH2)]+	0.160824	-0.361862	-1.30253	-2.4168	-3.38706	-3.79136	-3.40553	-2.46864	-1.53035	-0.992739	-0.913543	6.99
[Ni(NH3)2]2+	-12.6502	-10.5405	-7.99225	-5.16208	-2.01531	1.58011	5.6377	9.59684	6.24416	-1.62335	-6.56545	5.77
[Ni(NH3)2(NH2)]+	-24.7617	-26.0001	-25.5788	-23.799	-21.0202	-17.5882	-13.8087	-9.93359	-6.16859	-2.68838	0.364829	6.45
[Ni(NH3)3]2+	-30.1753	-28.0211	-25.3419	-22.6627	-20.2897	-18.3861	-17.0153	-16.175	-15.8245	-15.9096	-16.3795	6.91
[Ni(NH3)4]2+	-62.4089	-58.3614	-54.1095	-50.2266	-46.9959	-44.5478	-42.8964	-41.931	-41.3808	-40.7967	-39.6164	-4.43
[Ni(NH3)5]2+	-39.9129	-38.4574	-36.3932	-34.6668	-33.6328	-33.4535	-35.3024	-35.8858	-38.5461	-42.4034	-47.2744	10.74
[Ni(NH3)6]2+	5.33856	4.82748	10	15.7862	18.5752	20.9471	22.2954	21.2202	17.9187	13.4458		14.06
[Ni(OH)]+	8.69021	9.4299	10.5494	11.7192	12.4349	12.0746	10.5544	8.78798	7.52962	6.75978	6.10077	9.9
[Ni(OH)(H2O)]+	7.02063	7.35249	7.69591	7.65206	7.04812	6.19878	5.58996	5.31191	5.07428	4.62474	3.93837	10.72
[Ni(OH)(H2O)2]+	-2.08597	-1.85301	-1.22455	-0.512627	0.13055	0.67397	1.13908	1.52782	1.80644	1.9381	1.91054	10.14
[Ni(OH)(H2O)3]+	-45.3168	-44.009	-41.8053	-39.1236	-36.2034	-33.1561	-30.0051	-26.7368	-23.3379	-19.8153	-16.2065	3.04
[Ni(OH)2]	-9.60378	-5.5	-2.13493	1	3.14863	4.91225	5.95772	6.39629	6.427	6.2059	5.81952	10.27
[Ni(OH)3]−	-8.5857	-6.13267	-3.69536	-1.78895	-0.517602	0.118875	0.158703	-0.342326	-1.32114	-2.71991	-4.50841	8.88
[Ni(OH)4]2−	-13.1741	-8.53585	-5.45866	-3.32968	-1.70663	-0.23444	1.33536	3.1377	5.21708	7.57806	10.2442	-1.78
[Ni(PH2)]+	-4.83447	-2.05822	-0.0866877	1.18448	1.90816	2.23314	2.31989	2.33357	2.39472			1.16
[Ni(PH2)2]	-16.1942	-23.1493	-21.8413	-16.1033	-9.89028	-4.02457	1.22551	5.76158	9.55232	12.5913		-16.26
[Ni(PH2)3]−	-3.87055	-14.2993	-12	-11	-10.1794	-8.46426	-7.46481	-7.0079	-6.91542	-7.04427		-12.14
[Ni(PH3)]2+	-7.2132	-3.34886	0.109843	3.18376	5.82185	7.96516	9.67367	11.2814	13.3546	16.1687		5.75
[Ni(PH3)(PH2)]+	-22.3279	-17.4853	-14.0754	-11.3697	-8.83635	-6.14495	-3.1527	0.133981	3.60034	7.07604	10.3604	-7.94
[Ni(PH3)2]2+	0.198126	2.31079	3.75703	4.70063	5.58451	6.85668	8.58596	10.8545	13.6117	3.32382	-3.55748	9.87
[Ni(PH3)2(PH2)]+	-31.7138	-31.5154	-30.3778	-28.4854	-25.9234	-22.8373	-19.4004	-15.7849	-12.155	-8.67004	-5.49638	-10.01
[Ni(PH3)3]2+	-24.4636	-24.8593	-23.397	-21.2594	-19.0448	-17.0776	-15.5427	-14.5255	-14.0485	-14.1341	-14.8871	-5.66
[Ni(PH3)4]2+	-48.6117	-47.8245	-43	-39.8632	-35.8246	-32.167	-28.9798	-26.2547	-23.9042	-21.7841	-19.7102	-20.59
[Ni(PH3)5]2+	-41.3746	-37.4629	-36	-35	-34	-33	-32.3021	-34.5847	-37.6776	-41.4592	-45.8552	-23.89
[Ni(SH)]+	5.9488	6.29882	7.06461	7.96251	8.6134	8.56306	7.66045	6.38486	5.3152			6.78
[Ni(SH)2]	-4.99663	-10.6504	-5.7961	-2.59128	-0.75363	0.331947	0.949717	1.19573	1.10086	0.717227	0.131727	5.17
[Ni(SH2)]2+	-0.352555	2.04812	4.29727	6.33169	8.05098	9.37288	10.332	11.2388	12.6501			8.05
[Ni(SH2)(SH)]+	-3.41505	-1.99301	-0.760535	0.421352	1.71835	3.22498	4.99361	7.00143	9.10951	11.0733	12.6172	9.07
[Ni(SH2)2]2+	3.38513	4.6145	5.66169	6.80334	8.23935	9.99898	12.1581	14.8284	11.4486	6.32929	6.38917	8.42
[Ni(SH2)2(SH)]+	-3.68718	-5.36872	-6.30052	-6.93213	-7.5047	-8.13327	-8.87085	-9.72619	-10.6745	-11.6735	-12.6858	3.17
[Ni(SH2)3]2+	-14.4994	-14.6726	-13.7797	-12.7464	-11.9745	-11.6671	-11.9261	-12.7681	-14.1447	-15.9758	-18.1901	3.48
[Ni(SH2)4]2+	-35.0449	-33.7767	-30.9214	-27.9704	-25.3114	-23.1148	-21.4607	-20.3513	-19.7108	-19.3881	-19.1566	-3.29
[Ni(SH2)5]2+	-26.2979	-21.8601	91.1252	-17.1477	-16.2277	-16.1696	-16.9583	-18.5751	-21.0331	-24.4189	-28.7552	3.83
[Ni(SH2)6]2+	2.66106	3	3.93001	9	14.6176	16.7863	18.5133	19.3912	18.5547	16.2098		10.91
[Ni(SH)3]−	-9.42396	-3.41155	-0.693205	1.44341	2.95484	3.89177	4.34825	4.42773	4.22065	3.79053	3.17104	3.03
MAE	21.7722	19.8805	18.3966	15.8401	14.6155	14.1502	13.9198	13.7743	14.0041	14.8566	16.8363
# of systems	85	85	85	85	85	85	85	84	82	72	58	85

## Sheet: S7 (Ni3_2000K)
Table S7 Variation of DEHS-LS as we increase F0 parameter, for Ni(III) complexes, with new, DFTB+U, Hamiltonian. MAE are also provided. F0 is expressed in
Hartree, ΔELS-HS in kcal/mol and T=2000K.
F0	0	0.005	0.01	0.015	0.02	0.025	0.03	0.035	0.04	0.045	0.05	OPBE
[Ni(AcO)]2+	-19.5846	-20.1263	-20.3001	-20.0929	-19.4979	-18.5235	-17.1972	-15.5691	-13.7156	-11.7558	-9.88217	-5.67
[Ni(CN)]2+	-4.97925	-2.30255	0.708287	4.01118	7.55633	11.2839						-51.37
[Ni(CN)2]+	-1.48054	2.01701	4.77138	6.96226	8.93918	10.9787	13.2009	15.5974	18.0351	19.968		9.78
[Ni(CN)3]	-36.7064	-29.6594	-25.5203	-22.3192	-18.9742	-15.3149	-11.487	-7.63222	-3.86143	-0.26424	3.08881	-14.35
[Ni(CN)4]−	-36.2998	-33.6773	-30.6061	-27.3169	-23.9729	-20.6594	-17.433	-14.334	-11.3824	-8.5765	-5.89363	-20.39
[Ni(CO3)]+	-22.977	-22.2532	-21.0301	-19.4333	-17.5474							-8.98
[Ni(CS)]3+	-524.765	-515.718										-532.17
[Ni(CS)3]3+	-25.0165	-23.6337	-22.5133	-21.3943	-20.1049	-18.624	-17.008	-15.3317	-13.6662	-12.0682		-13.54
[Ni(CS)4]3+	-26.281	-27.1377	-26.9624	-26.1717	-25.0102	-23.6326	-22.1341	-20.5697	-18.9667			-20.48
[Ni(en)]3+	-34.3997	-31.3651	-28.4151	-25.5816	-22.8664	-20.261						-8.32
[Ni(en)2]3+	-35.4547	-33.3203	-32.5575	-32.0919	-31.5074	-30.6507	-29.35	-27.4623	-25.1193	-22.5857	-20.0757	-16.13
[Ni(form.)2]3+	-3.20063	-4.25245	-4.97113	-5.45266	-5.80155	-6.05136						8.44
[Ni(form.)3]3+	-5.35274	-5.27331	-5.17802	-4.93371	-4.40787	-3.54754						5.8
[Ni(form.)4]3+	-17.3719	-15.5453	-14.2301	-13.4719	-12.958	-12.4512	-11.8147	-11.0167	-10.1064			5
[Ni(NC)]2+	-10.6729	-8.76662	-6.54161	-3.98697	-1.10259	2.09373	5.56744					-3.26
[Ni(NC)2]+	-14.9948	-12.7414	-9.73564	-6.18405	-2.24864	1.9131	6.13317	10.2502	14.1662	17.91	21.6425	2.65
[Ni(NC)3]	-30.2282	-27.6592	-24.7469	-21.7229	-18.6818	-15.6677	-12.7139	-9.85875	-7.14299	-4.6055	-2.2778	2.75
[Ni(NC)4]−	-33.2918	-32.5665	-31.9463	-30.5575	-28.5872	-26.3068	-23.8859	-21.437	-19.0341	-16.7178	-14.4999	3.1
[Ni(NCS)]2+	11.2077	11.378	11.7962	12.5013	13.4876							7.91
[Ni(NCS)2]+	3.66349	3.39834	3.20111	2.88142	2.32183							8.7
[Ni(H2O)(NH3)2]3+	-23.5026	-22.6605	-20.9923	-18.7866	-16.1551	-13.1694	-9.92872	-6.55248	-3.16635	0.10897	3.17274	-3
[Ni(H2O)(SH2)2]3+	-37.6215	-38.0183	-37.9622	-37.4956	-36.834	-36.1278	-35.4571	-34.8663	-34.3959	-34.1058	-34.1013	-24.6
[Ni(H2O)2(NH3)2]3+-cis	-24.5617	-23.0293	-21.2801	-19.2918	-17.0752	-14.6913	-12.236	-9.8229	-7.56746	-5.57346	-3.92167	1.65
[Ni(H2O)2(NH3)2]3+-trans	-24.7449	-24.2484	-23.5065	-22.0445	-20.0193	-17.6332	-15.0572	-12.455	-9.98025	-7.76587	-5.91423	1.33
[Ni(NH3)(SH2)2]3+	-12.5867	-11.22	-10.2533	-9.44241	-8.47321	-7.10688	-5.23769	-2.87692	-0.108352	2.94313	6.1295	6.85
[Ni(NH3)3(SH2)]3+	-13.7198	-13.4154	-13.6969	-13.9978	-13.937	-13.1623	-11.6264	-9.55493	-7.19223	-4.75102	-2.41939	1.53
[Ni(CH3)2]+	-47.5774	-42.8486	-39.3953	-36.0166	-32.0889	-27.4097	-21.9631	-15.7987	-8.99224	-1.63785	6.14734	-34.48
[Ni(CO)3]3+	-22.2345	-22.4944	-22.9516	-23.2875	-23.1002	-22.2046	-20.7045	-18.7653	-16.535	-14.1538	-11.7572	-7.79
[Ni(CO)4]3+	-27.8834	-29.6365	-31.8549	-33.2892	-33.4927	-32.7736	-31.4307	-29.6696	-27.6578	-25.5364	-23.4158	-18.62
[Ni(CO)5]3+	-63.6867	-63.9923	-62.9045	-61.2446	-59.5805	-58.2687	-57.3969	-56.9848	-57.0741	-57.7172	-58.9623	-33.53
[Ni(CO)6]3+	-68.9904	-68.6544	-64.892	-60.3533	-56.6422	-53.7833	-51.4787	-49.6586	-48.3209			-40.99
[Ni(H2O)2]3+	1.64688	2.87199	4.67559	6.97731	9.69755	12.7297	15.9534	19.2637	22.5763	25.8068	28.8205	12.49
[Ni(H2O)3]3+	-14.6867	-13.4263	-11.0726	-8.20539	-5.41016	-2.90473	-0.626178	1.45547	3.33121	4.98949	6.43144	13.72
[Ni(H2O)4]3+	-19.1611	-17.3609	-15.2595	-12.967	-10.5655	-8.13548	-5.76422	-3.5416	-1.55285	0.128581	1.44734	14.13
[Ni(H2O)5]3+	-36.7617	-34.1029	-31.0948	-27.9314	-24.7415	-21.6332	-18.7036	-16.0418	-13.7307	-11.8506	-10.4767	1.16
[Ni(H2O)6]3+	-36.0453	-31.9022	-27.7885	-23.8345	-20.1397	-16.7843	-13.8234	-11.2903	-9.20435	-7.57776	-6.42379	1.76
[Ni(NH2)]2+	-7.78028	-5.59665	-3.47615	-1.43508	0.492269	2.27135	3.8675	5.22974	6.28575	6.99745		3.27
[Ni(NH2)2]+	-7.0823	-10.0056	-11.3848	-11.3332	-10.4496	-9.18695	-7.82481	-6.52619	-5.33875	-4.19109	-2.92066	0.86
[Ni(NH3)(NH2)]2+	-10.0534	-10.4375	-10.2808	-9.70474	-8.82668	-7.72188	-6.43608	-4.99898	-3.44037	-1.79014	-0.0797334	0.33
[Ni(NH3)2(NH2)]2+	-42.1307	-38.7717	-34.8054	-31.0622	-27.6195	-24.378	-21.2208	-18.053	-14.8158	-11.4917	-8.10252	-1.32
[Ni(NH3)3]3+	-16.182	-15.7781	-15.4086	-14.3627	-12.4459	-9.79586	-6.59252	-3.01201	0.773749	4.60447	8.34246	-1.53
[Ni(NH3)4]3+	-11.9436	-15.7227	-18.1437	-18.4936	-17.5234	-15.6973	-13.3501	-10.7613	-8.16649	-5.75596	-3.66948	-1.94
[Ni(NH3)5]3+	-60.1768	-57.2835	-54.194	-51.0353	-47.8253	-44.6371	-41.5436	-38.6137	-35.9182	-33.5341	-31.5481	-24.85
[Ni(NH3)6]3+	-71.2369	-65	-60.6029	-55.8006	-51.5023	-47.6355	-44.1514	-41.0276	-38.2642	-35.8792	-33.9137	-26.58
[Ni(OH)]2+	3.76302	4.61697	5.52884	6.51913	7.60732	8.80088	10.0874	11.4233	12.7021	13.6659	13.9013	14.21
[Ni(OH)(H2O)]2+	16.9037	18.786	20.4202	21.979	23.415	24.5095	24.9383	24.5122	23.3849	21.8389	20.1003	14.85
[Ni(OH)(H2O)2]2+	-13.0715	-10.785	-8.22554	-5.54331	-2.81898	-0.102795	2.56191	5.12706	7.53456	9.71384	11.5841	8.46
[Ni(OH)(H2O)3]2+	-36.9587	-34.4736	-31.9354	-29.4874	-27.1812	-25.0424	-23.0923	-21.3536	-19.8482	-18.5897	-17.5763	-0.08
[Ni(OH)2]+	-5.1266	-0.530973	3.39419	6.69156	9.31876	11.1873	12.2692	12.6534	12.5818	12.4028	12.5199	9.79
[Ni(OH)3]	-19.1323	-15.9171	-12.2417	-8.37128	-4.41674	-0.446749	3.48143	7.31137	10.9813	14.4207	17.5539	-2.75
[Ni(OH)4]−	-29.2051	-25.7745	-22.9707	-20.5918	-18.6072	-17.0424	-15.9351	-15.3152	-15.1945	-15.5589	-16.3629	-8.81
[Ni(PH2)]2+	-19.7561	-17.3304	-15.1614	-13.1466	-11.2175	-9.33866						-12.67
[Ni(PH2)2]+	-25.0124	-22.7663	-21.3792	-19.9203	-17.7301	-14.5713	-10.4467					-19.36
[Ni(PH2)3]	-27.4357	-30.497	-24.5712	-18.2949	-12.2788	-6.44335	-0.753979	4.77583	10.1076	15.1968	20.007	-21.69
[Ni(PH3)(PH2)]2+	-26.7723	-26.2844	-23.7495	-19.8558	-15.3735	-11.3437	-8.01817	-4.97064	-1.84965			-14.63
[Ni(PH3)2(PH2)]2+	-34.1385	-34.5253	-31.9666	-28.8929	-26.0018	-23.4076	-21.0108	-18.6655	-16.2398			-14.87
[Ni(PH3)3]3+	-29.7729	-25	-20	-15.9168	-13.4568	-11.3123	-8.93085	-5.98531	-2.52471	1.24553	5.10698	-7.03
[Ni(PH3)4]3+	-19.2455	-18	-17	-16	-15.3383	-15.0559	-13.2153	-10.3832	-6.91811	-3.07068	0.957945	-13.04
[Ni(PH3)5]3+	-53.6282	-57.6856	-77.2272	-78.1259	-79.3744	-52.2097	-50.5409	-49.0145	-47.6714	-46.5738	-45.7917	-43.99
[Ni(SH)]3+	2.46759	3.94288	5.10067	6.13258	7.18785							5.3
[Ni(SH)2]+	-3.52437	-5.81893	-7.14115	-7.47776	-6.91137	-5.70444	-4.13487	-2.41764	-0.696895			0.52
[Ni(SH2)(SH)]2+	-12.5215	-12.2773	-11.3738	-10.0747	-8.53729	-6.86295	-5.11275	-3.31492				0.63
[Ni(SH2)2]3+	5.71118	4.10862	2.86572	2.1292								5.62
[Ni(SH2)2(SH)]2+	-18.2886	-20.2824	-18.8211	-16.0509	-12.9483	-9.95873	-7.19411	-4.6555	-2.33411	-0.238857	1.60488	-0.31
[Ni(SH2)3]3+	-11.585	-10	-8.24492	-7.04174	-5.77181	-4.18189	-2.17115	0.201709	2.80343	5.48578	8.10832	2.44
[Ni(SH2)4]3+	-9.9828	-10	-10.8918	-9	-7.81328	-5.38876	-2.52286	0.673935	4.09176	7.61887	11.1441	2.36
[Ni(SH2)5]3+	-34.3937	-39	-43.5121	-39	-33.1794	-30.5595	-27.7955	-25.0584	-22.4531	-20.0682	-18.0066	-18.8
[Ni(SH2)6]3+	-33.4894	-34	-33	-32	-34.1856	-30.8859	-27.9402	-25.3819	-23.1706	-21.3278	-19.9459	-19.74
[Ni(SH)3]	-13.7922	-14.8242	-13.6048	-11.7041	-9.52202	-7.20851	-4.85437	-2.53191	-0.302518	1.78421	3.69136	-4.01
MAE	17.3199	16.5772	15.529	13.9469	12.7257	11.5275	9.85216	9.03093	8.63992	8.93749	9.43244
# of systems	69	69	68	68	67	63	58	56	55	49	46	69

## Sheet: S8 (Ni2_100K)
Table S8 Variation of DEHS-LS as we increase F0 parameter, for Ni(II) complexes, with new, DFTB+U, Hamiltonian. MAE are also provided. F0 is expressed in
Hartree, ΔELS-HS in kcal/mol and T=100K.
F0	0	0.005	0.01	0.015	0.02	0.025	0.03	0.035	0.04	0.045	0.05	OPBE
[Ni(AcO)]+
[Ni(CN)]+	-13.4283	-9.659	-5.75541	-1.85961	1.90257	5.45718	10.402					4.33
[Ni(CN)2]
[Ni(CN)3]−	-30.1729	-28.6314	-25.261	-21.4336	-17.732	-14.4173	-11.5878	-9.25603	-7.3979	-5.98384	-4.99734	-17.39
[Ni(CN)4]2−	-61.2506	-57.2602	-52.6483	-48.3323	-44.5312	-41.2487	-38.4032	-35.8855	-33.5881	-31.4178	-29.2999	-28.31
[Ni(CO3)]	-25.1565	-23.8337	-20.9009	-17.3639	-13.7773	-10.5139	-7.98882	-6.40132				-7.31
[Ni(CS)]2+	-14.1069	-11.624	-9.13251	-6.79866								7.37
[Ni(CS)2]2+	-14.2551	-12.0773	-9.62757	-7.15933	-5.02812							4.6
[Ni(CS)3]2+	-37.1122	-38.4529	-38.3256	-37.9195								-19.99
[Ni(en)]2+	-26.4718	-23.6268	-20.1521	-16.5395								1.98
[Ni(en)2]2+	-63.3519	-60.5548	-56.3189	-51.7946	-47.4641	-43.5555	-40.1359	-37.13	-34.3181	-31.3508	-27.8189	-15.67
[Ni(form.)]2+	-2.56397	-0.218299	2.09215	4.39277	6.67602	8.91298	11.0743	13.1315	14.4772	13.5292		7.74
[Ni(form.)2]2+	1.20622	3.74504	5.89424	7.52079	8.37253	8.19246	6.96212	4.87337	2.14391			8
[Ni(form.)3]2+	-27.214	-25.3195	-22.6163	-19.6223	-16.6362	-13.8221	-11.2517	-8.95141	-6.94683			6.69
[Ni(form.)4]2+	-42.7838	-42.6586	-41.4979	-40.0579	-38.7158	-37.6273	-36.81	-36.2263	-35.8382			0.54
[Ni(NC)]+	-7.68956	-4.3362	-0.817886	2.74795	6.24407	9.57	11.9269					3.48
[Ni(NC)2]	7.32273	9.69252	11.6901	12.0033								8.45
[Ni(NC)3]−	-25.551	-23.9609	-21.6738	-19.272	-17.0598	-15.1887	-13.7158	-12.6419	-11.9414	-11.5817	-11.5344	1.99
[Ni(NC)4]2−	-57.4623	-54.517	-51.3757	-48.5147	-46.119	-44.2177	-42.7531	-41.6276	-40.7343	-39.9729	-39.2545	-7.57
[Ni(NCS)]+	8.15395	9.01795										7.83
[Ni(NCS)2]	4.59575	5.85207	7.97102	9.16036	10.702	11.9948	12.9698	13.5997	13.8829	13.8408	13.5104	7.23
[Ni(H2O)(NH3)]2+	-4.66854	-1.33297	2.26406	5.99728	9.79341	13.4284	15.3487	13.8474				8.84
[Ni(H2O)(NH3)2]2+	-26.5608	-22.9958	-19.2693	-15.6885	-12.4498	-9.66789	-7.39158	-5.61328	-4.26934	-3.23739	-2.35907	7.33
[Ni(H2O)(SH2)]2+	3.24964	6.19521	8.94389	11.3692	13.3039	14.5868	15.1133	14.8471				9.33
[Ni(H2O)(SH2)2]2+	-17.9024	-15.0003	-11.835	-8.71915	-5.8734	-3.46991	-1.62281	-0.376265	0.294307	0.472204	0.287078	4.65
[Ni(H2O)2(NH3)]2+	-22.0612	-18.3567	-14.6388	-11.1421	-7.9972	-5.25749	-2.91785	-0.930641	0.782042	2.31498	3.75665	10.56
[Ni(H2O)2(NH3)2]2+-cis	-54.1946	-50.13	-45.9954	-42.2428	-39.1152	-36.7469	-35.1989	-34.4765	-34.5309	-35.2299	-36.2396	4.07
[Ni(H2O)2(NH3)2]2+-trans	-55.0586	-50.8136	-46.4378	-42.4271	-39.0504	-36.456	-34.7117	-33.8249	-33.7463	-34.3414	-35.2718	1.61
[Ni(H2O)2(SH2)]2+	-19.0282	-15.7947	-12.4028	-9.08209	-6.0078	-3.30298	-1.02931	0.806016	2.23487	3.31602	4.12518	8.96
[Ni(NH3)(SH2)]2+	-4.14226	-2.42254	-0.258963	2.1503	4.68553	7.30294	9.99838	11.4339				7.75
[Ni(NH3)(SH2)2]2+	-22.4562	-20.9803	-18.3561	-15.236	-12.017	-8.9871	-6.35211	-4.23325	-2.67167	-1.64371	-1.08883	4.49
[Ni(NH3)2(SH2)]2+
[Ni(NH3)3(SH2)]2+	-50.2203	-46.8907	-42.7096	-38.4545	-34.501	-31.0716	-28.2833	-26.1561	-24.613	-23.482	-22.5245	-3.29
[Ni(CH3)]+
[Ni(CH3)2]	-47.6995	-38.8676	-29.361	-20.9208	-6.91918	3.36607	12.0345	19.0566	24.3665	27.9502	29.8543	-11.37
[Ni(CO)]2+
[Ni(CO)2]2+	-22.5013	-18.2644										9.08
[Ni(CO)3]2+	-45.0987	-41.5826	-37.0518	-33.2619	-30.2497	-27.9556	-26.3228	-25.26	-24.6541	-24.3896	-24.3674	-1.76
[Ni(CO)4]2+	-61.0001	-58.9347	-56.526	-54.1901	-52.138	-50.4495	-49.1138	-48.0618	-47.1936	-46.401		-19.19
[Ni(CO)5]2+	-39.1058	-39.5768	-40.6355	-42.6288	-45.6536	-49.6711	-54.5623	-60.1695	-66.3273	-72.8829	-79.7127	-14.84
[Ni(CO)6]2+	6.05682	8.48785										11.74
[Ni(H2O)]2+	7.14669	7.80087	8.85124	10.2123	11.79	13.5139	15.3654	17.4144	18.7311	16.777		14.15
[Ni(H2O)2]2+	5.80328	6.46088	8.13696	10.6264	13.7993	19.2536	16.1106	12.1819				12.61
[Ni(H2O)3]2+	-10.4992	-7.73872	-4.93377	-2.27448	0.149947	2.30439	4.17656	5.75853	7.04262	8.02814	8.72956	10.46
[Ni(H2O)4]2+	-39.8068	-36.5323	-33.5388	-31.0622	-29.2154	-28.0355	-27.4939	-27.472	-27.7115	-27.8029	-27.2831	12.85
[Ni(H2O)5]2+	-18.4589	-16.2302	-14.4357	-13.2139	-12.6456	-12.7995	-13.7454	-15.5209	-18.0296	-20.9865	-24.1379	13.86
[Ni(H2O)6]2+
[Ni(NH2)]+	5.60673	5.64714	5.53572	5.19423	4.47578	3.19056						6.56
[Ni(NH2)2]	-14.7808	-19.7196	-18.2082	-14.9354	-11.4517	-8.26136	-5.52405	-3.24237	-1.3496	0.237713	1.58713	2.18
[Ni(NH3)]2+
[Ni(NH3)(NH2)]+	-1.41012	-1.32903	-1.79695	-2.63125	-4.38984							6.99
[Ni(NH3)2]2+	-12.3395	-9.99318	-7.16083	-4.0477	-0.780591	2.59971	6.13966	6.41742				5.77
[Ni(NH3)2(NH2)]+	-24.4944	-24.8551	-23.4724	-20.7265	-16.9811	-12.6148	-7.98544	-3.37676	1.01321	5.05155	8.64939	6.45
[Ni(NH3)3]2+	-29.1083	-26.2973	-22.8295	-19.2144	-15.776	-12.7232	-10.183	-8.21904	-6.82734	-5.90888	-5.2487	6.91
[Ni(NH3)4]2+	-60.4651	-55.8948	-50.8773	-46.0638	-41.7735	-38.17	-35.313	-33.1688	-31.5914	-30.2845	-28.8075	-4.43
[Ni(NH3)5]2+	-39.5952	-37.0463	-34.105	-31.4839	-29.4886	-28.296	-28	-28.7824	-30.6175	-33.4451	-36.8021	10.74
[Ni(NH3)6]2+
[Ni(OH)]+	10.4056	11.8452	12.6758	13.1417	12.3206	12.3384	13.8619	15.5894	17.0387	18.2579	19.2189	9.9
[Ni(OH)(H2O)]+	7.92449	7.13912	6.45331	6.33365	7.39018	9.08814	10.7118	12.0972	13.2384	14.1546	14.8646	10.72
[Ni(OH)(H2O)2]+	-3.92034	-3.03645	-1.56347	0.257836	2.2496	4.27721	6.24181	8.07406	9.72904	11.1804	12.4135	10.14
[Ni(OH)(H2O)3]+	-42.9758	-40.9029	-37.9617	-34.4968	-30.7535	-26.8776	-22.9221	-18.8898	-14.7767	-10.5936	-6.35985	3.04
[Ni(OH)2]	-11.2625	-6.92858	-2.68281	1.14967	4.44241	7.19923	9	11.3587	12.9044	14.1739	15.2114	10.27
[Ni(OH)3]−	-9.04351	-5.88847	-2.80849	-0.214342	1.80326	3.23789	4.11728	4.48556	4.39334	3.88964	3.01438	8.88
[Ni(OH)4]2−	-9.66325	-4.2653	-0.375674	2.56828	4.9796	7.2223	9.58524	12.2493	15.2889	18.7046	22.4651	-1.78
[Ni(PH2)]+	-4.90378	-1.91648	0.474479	2.40716	3.93759	4.95035						1.16
[Ni(PH2)2]	-15.971	-21.2453	-18.1447	-11.4603	-4.23119	2.74197	9.10883	14.6868	19.3959	23.2174		-16.26
[Ni(PH2)3]−	-5.67807	-14.4664	-10	-8	-4.88378	-2.0289	0.0230048	1.40816	2	2.86945		-12.14
[Ni(PH3)]2+
[Ni(PH3)(PH2)]+	-18.6389	-13.7051	-10.1281	-7.47462	-5.40729							-7.94
[Ni(PH3)2]2+	-1.14078	-0.018349	1.49435	3.18049	4.93587	6.72212	8.39132					9.87
[Ni(PH3)2(PH2)]+	-30.804	-30.7223	-28.9387	-26.2058	-22.8025	-18.9005	-14.6721	-10.3037	-5.99168	-1.92466	1.71475	-10.01
[Ni(PH3)3]2+	-24.1433	-23.4089	-20.9596	-17.8047	-14.4589	-11.2549	-8.43084	-6.14656	-4.48861	-3.48676	-3.13841	-5.66
[Ni(PH3)4]2+	-46.6811	-45.629	-40	-35	-31.7926	-27.2102	-23.0613	-19.4009	-16.2114	-13.4208	-10.9217	-20.59
[Ni(PH3)5]2+	-38.9191	-36.2462	-34	-32	-30	-28	-27.9208	-29.5308	-32.0281	-35.2809	-39.1466	-23.89
[Ni(SH)]+	7.69188	7.66357	7.76234	7.99105	8.14377	7.98611						6.78
[Ni(SH)2]	-6.84674	-10.9858	-6.99016									5.17
[Ni(SH2)]2+	-4.05687	-1.15813	1.76825	4.56115	6.94343							8.05
[Ni(SH2)(SH)]+	-2.89888	-1.00946	0.849993	2.62632	4.25753							9.07
[Ni(SH2)2]2+	0.482962	2.11839	4.15406	6.41729	8.78288	11.1616	13.5174	15.8572				8.42
[Ni(SH2)2(SH)]+	-5.57978	-6.47112	-6.25102	-5.66756	-4.97868	-4.32568	-3.80498	-3.47433	-3.34968	-3.41053	-3.61666	3.17
[Ni(SH2)3]2+	-13.7823	-12.8622	-11.1076	-9.12446	-7.23628	-5.67494	-4.60887	-4.13539	-4.27403	-4.9715	-6.11393	3.48
[Ni(SH2)4]2+	-33.445	-31.0628	-27.4507	-23.6391	-19.9884	-16.7052	-13.9254	-11.7216	-10.1031	-9.01602	-8.33565	-3.29
[Ni(SH2)5]2+	-24.5629	-20.2502	-16.7423	-14.113	-12.2951	-11.3018	-11.1652	-11.9023	-13.5068	-15.9522	-19.1686	3.83
[Ni(SH2)6]2+	4.03139	4.5	4.96262									10.91
[Ni(SH)3]−	-8.80055	-2.43196	1.23452	4.37999	6.96095	8.9804	10.4773	11.5141	12.1625	12.4913	12.5574	3.03
MAE	21.4952	19.5349	17.4128	15.4708	13.9311	13.6915	13.6522	13.8213	15.5531	15.6933	15.9382
# of systems	76	76	73	71	67	62	59	56	49	46	41	86

## Sheet: S9 (Ni3_100K)
Table S9 Variation of DEHS-LS as we increase F0 parameter, for Ni(III) complexes, with new, DFTB+U, Hamiltonian. MAE are also provided. F0 is expressed in
Hartree, ΔELS-HS in kcal/mol and T=100K.
F0	0	0.005	0.01	0.015	0.02	0.025	0.03	0.035	0.04	0.045	0.05	OPBE
[Ni(AcO)]2+	-16.9657	-17.2839	-17.1925	-16.6719	-15.7318	-14.4443						-5.67
[Ni(CN)]2+	-3.90034	-1.06252	2.20428	5.86461	9.87077	14.1635	18.6636					-51.37
[Ni(CN)2]+	-3.91647	2.00301	4.50591	6.74499	9.30011	12.0994	15.0774	18.1786				9.78
[Ni(CN)3]	-38.9301	-30.6067	-27.0183	-24.1758	-21.5234	-18.9808						-14.35
[Ni(CN)4]−	-37.9777	-35.2602	-32.2668	-29.1734	-26.0416	-22.9175	-19.8447	-16.8622	-13.9979	-11.2658	-8.66588	-20.39
[Ni(CO3)]+	-21.0367											-8.98
[Ni(CS)]3+	-523.972	-514.432	-505.1									-532.17
[Ni(CS)3]3+	-25.523	-23.3808	-21.8413	-20.0468	-17.9556							-13.54
[Ni(CS)4]3+	-27.1541	-27.8815	-27.5376	-26.6239	-25.3846	-23.9621	-22.4489	-20.9064	-19.3735			-20.48
[Ni(en)]3+	-34.2514	-31.0558	-27.8571	-24.7263								-8.32
[Ni(en)2]3+	-36.6709	-33.6848	-33.9495	-33.5045	-32.5995	-31.1663						-16.13
[Ni(form.)2]3+	-5.83013	-7.51535	-8.68919									8.44
[Ni(form.)3]3+	-5.55053	-5.97043	-6.1825	-6.18942	-5.86368							5.8
[Ni(form.)4]3+	-15.6181	-15.6444	-14.8841	-13.8269	-12.5493	-10.2777						5
[Ni(NC)]2+	-8.49814	-6.31426	-3.72008	-0.715601	2.68619	6.45293	10.4977					-3.26
[Ni(NC)2]+	-15.2597	-12.47	-9.05367	-5.19521	-1.03422	3.30586	7.71192	12.0779	16.3049	20.3011	23.9665	2.65
[Ni(NC)3]	-32.3076	-29.8505	-27.1626	-24.4047								2.75
[Ni(NC)4]−	-34.8736	-34.8468	-34.0444	-32	-30.7999	-28.6242	-26.2359	-23.7326	-21.1926	-18.6722	-16.2032	3.1
[Ni(NCS)]2+	8.77348											7.91
[Ni(NCS)2]+	0.334959	2.3916	3.76852	4.2029	4.13633	3.73137	3.06322	2.1629				8.7
[Ni(H2O)(NH3)2]3+	-23.1695	-22.4022	-20.9306	-18.8807	-16.3608	-13.4819	-10.3666	-7.16791	-4.17573	-2.26404		-3
[Ni(H2O)(SH2)2]3+	-40.498	-40.4152	-40.0776	-39.6697	-39.2446	-38.8269	-38.4282					-24.6
[Ni(H2O)2(NH3)2]3+-cis	-25.5878	-24.2681	-22.6739	-20.8168	-18.696	-16.3475	-13.8428	-11.2787	-8.76486	-6.4145	-4.33366	1.65
[Ni(H2O)2(NH3)2]3+-trans	-26.1959	-25.6625	-24.789	-23.4972	-21.7614	-19.6283	-17.2014	-14.6173	-12.0254	-9.57195	-7.39081	1.33
[Ni(NH3)(SH2)2]3+	-12.312	-10.7474	-9.57971	-8.6676	-7.69473	-6.38154	-4.62811	-2.69343				6.85
[Ni(NH3)3(SH2)]3+	-14.8626											1.53
[Ni(CH3)2]+	-48.0897	-42.4941	-37.8937									-34.48
[Ni(CO)3]3+	-21.1654	-22.6512	-23.9523	-24.2877	-23.8502	-22.7251	-21.0077	-18.8021	-16.2284	-13.4204	-10.5216	-7.79
[Ni(CO)4]3+	-29.3289	-33.1027	-35.4851	-36.7121	-36.9367	-36.3144	-35.005	-33.1708	-30.9743	-28.5734	-26.1122	-18.62
[Ni(CO)5]3+	-62.2112	-62.3689	-61.4299	-59.9879	-58.4785	-57.3075	-56.6371	-56.4266				-33.53
[Ni(CO)6]3+	-68.6888											-40.99
[Ni(H2O)2]3+	-1.20339	0	1.26896									12.49
[Ni(H2O)3]3+	-13.4715	-11.144	-7.821	-4.33296	-1.07702	1.48269	3.36704	5.02436	6.50051	7.4767	6.81619	13.72
[Ni(H2O)4]3+	-19.0092	-17.1808	-15.1027	-12.8486	-10.4681	-8.01325	-5.53517	-3.08049	-0.697389	1.55307	3.59095	14.13
[Ni(H2O)5]3+	-37.2913	-34.4095	-31.0082	-27.3009	-23.5613	-19.9844	-16.6752	-13.7216	-11.2009	-9.17079	-7.66589	1.16
[Ni(H2O)6]3+	-37.2935	-33.1647	-29.0611	-25.1909								1.76
[Ni(NH2)]2+	-7.7257	-5.29831	-3.80262	-1.09014	1.67522							3.27
[Ni(NH2)2]+	-9.12941	-11.5333	-12.3623	-11.9767	-10.7121	-8.84502	-6.60053	-3.73878				0.86
[Ni(NH3)(NH2)]2+	-11.5025	-11.6053	-11.2466	-10.4965	-9.41676	-8.05551	-6.45267	-4.64816	-2.68857	-0.623636	1.536	0.33
[Ni(NH3)2(NH2)]2+	-39.861	-35.6922	-31.7986	-28.2853	-25.192	-23.0212	-23.1489					-1.32
[Ni(NH3)3]3+	-14.8677	-14.3696	-14.1364									-1.53
[Ni(NH3)4]3+	-14.8819	-19.0842	-20.923	-20.9397	-19.0116							-1.94
[Ni(NH3)5]3+	-58.6264	-55.7098	-52.2984	-48.6436	-44.8684	-41.0691	-37.3348	-33.7508	-30.398	-27.3534	-24.6933	-24.85
[Ni(NH3)6]3+	-68.439	-63.3695	-57.7794	-52.4108	-47.4833	-43.1195	-39.402	-36.3401				-26.58
[Ni(OH)]2+	1.80268	2.88476	4.14322	5.57767	7.18978	8.97639	10.9234	13.0019	15.1667	17.8546	18.261	14.21
[Ni(OH)(H2O)]2+	12.6069	14.6309	16.905	18.1216	19.2474	20.3859	21.3201	21.6871	21.113	19.6542	17.6936	14.85
[Ni(OH)(H2O)2]2+	-13.8909	-11.6497	-9.09777	-6.41068	-3.68278	-0.976571	1.65458	4.15426	6.45945	8.49714	10.1888	8.46
[Ni(OH)(H2O)3]2+	-36.9453	-34.5378	-32.0277	-29.5722	-27.2365	-25.0516	-23.0386	-21.2171	-19.6084	-18.232	-17.0956	-0.08
[Ni(OH)2]+	-8.61827	-4.57246	-0.640785	3.15741	6.7792	10.2664						9.79
[Ni(OH)3]	-19.2773	-16.0215	-12.2474	-8.28534	-4.29178	-0.368962	3.40413	6.96281	10.256	13.2394	15.8635	-2.75
[Ni(OH)4]−	-28.3995	-24.8564	-21.7786	-19.0582	-16.592	-14.032						-8.81
[Ni(PH2)]2+												-12.67
[Ni(PH2)2]+	-23.3704	-21.3321	-20.1434	-18.7657	-16.6789	-13.7941						-19.36
[Ni(PH2)3]	-27.6273	-30.0896	-23	-18.0394	-12.097	-6.23959	-0.43918	5.28395	10.8759	16.2741	21.4151	-21.69
[Ni(PH3)(PH2)]2+	-26.2279											-14.63
[Ni(PH3)2(PH2)]2+	-32.8891	-33.3147	-31.2216	-28.9743								-14.87
[Ni(PH3)3]3+	-28.8368	-23.3489	-18.5957	-15.3238								-7.03
[Ni(PH3)4]3+	-19.0902	-16.8464										-13.04
[Ni(PH3)5]3+	-54.7762	-56.5518	-52	-51	-50	-48.4322	-46.146	-43.918	-41.8471	-40.0401	-38.6012	-43.99
[Ni(SH)]3+	-3.46824	-1.18749	1.06805	3.34062	5.67103							5.3
[Ni(SH)2]+	-5.81573	-9.28995										0.52
[Ni(SH2)(SH)]2+	-11.7504	-11.7896	-11.0636	-9.80842	-8.4434	-7.63668						0.63
[Ni(SH2)2]3+	4.85557	3.51331	2.26837									5.62
[Ni(SH2)2(SH)]2+	-18.4401											-0.31
[Ni(SH2)3]3+	-11.8256	-9.71751	-8.45371	-7.73355	-6.69474	-4.99972	-2.7673	-0.174433	2.56362	5.14762	7.19244	2.44
[Ni(SH2)4]3+	-10.4945	-12.1163	-11	-10.3066	-8.20788	-5.53555	-2.38184	1.16094	4.98358	8.95809	12.9403	2.36
[Ni(SH2)5]3+	-34.1613	-36.3589	-33	-33.8479	-31.3294	-28.4422	-25.3737	-22.2602	-19.219	-16.3617	-13.7952	-18.8
[Ni(SH2)6]3+	-33.9487	-48.098	-44.7765	-37	-32.407	-29.4925						-19.74
[Ni(SH)3]	-14.6771	-15.1428	-13.8144	-11.8422	-9.51371	-6.97298	-4.32198	-1.64396	0.990677	3	5.90715	-4.01
MAE	17.9009	17.4401	16.2527	15.0157	13.1244	12.5158	12.7484	9.51966	8.75158	9.15572	9.90889
# of systems	68	62	60	54	49	44	35	31	25	24	23	69

## Sheet: S10 (DFT_Ni2)
	Table S10 Variation of DEHS-Lswith various DFT funcionals, for Ni2+ complexes. MAE are also provided. ΔELS-HS is expressed in in kcal/mol.
			GGA						metaGGA		HYBRID					metaHYBRID
			OPBE	S12g	BLYP	PW91	BP86	PBE	TPSS	M06-L	B3LYP	PBE0	X3LYP	B1LYP	B3LYP*	TPSSH	M06
	[Ni(AcO)]+		2.31	3.03	1.63	0.93	1.12	0.42			10.13
	[Ni(CN)]+		4.33	5.86	6.53	5.28	5.94	5.36	7.08	9.1	21.64	10.03	10.33	10.92	9.08	8.99	8.87
	[Ni(CN)2]		-5.95	-2.99	-1.82	-4.66	-3.8	-4.45	0	8.21	10.86	13.54	12.15	15.91	6.33	6.67	4.86
	[Ni(CN)3]−		-17.39	-13.86	-13.61	-16.42	-15.55	-16.07	-16.1	-11.26	-8.65	-8.23	-8.09	-6.16	-10.83	-13.63	-5.15
	[Ni(CN)4]2−		-28.31	-26.94	-25.23	-28.85	-27.78	-28.56	-24.44	-15.81	-15.9	-14.57	-15	-11.52	-19.91	-19.48	-21.45
	[Ni(CO3)]		-7.31	-5.43	-6.05	-6.91	-6.54	-6.61	-5.53	-2.14	-0.17	2.02	0.56	2.38	-2.26	-2.27	-4.33
	[Ni(CS)]2+		7.37	8.25	7.64	7.17	7.38	7.32	9.5	15.62	30.25	14.59	13.28	14.4	11.17	12.61	10.44
	[Ni(CS)2]2+		4.6	6.35	6.16	5.37	5.67	5.55	7.84	14.88	27	13.66	12.49	13.62	10.33	11.38	9.93
	[Ni(CS)3]2+		-19.99	-18.35	-16.93	-20.24	-19.17	-20.02	-14.2	-4.32	0	3.02	1.43	5.74	-5.57	-5.34	-6.05
	[Ni(CS)4]2+		-36.88	-35.84	-33	-36.27	-35.36	-36.08	-34.07	-31.92	-42.82	-29.79	-29.22	-26.89	-32	-32.24	-34.1
	[Ni(en)]2+		1.98	1.44	-0.69	-0.44	-0.12	-0.26	2.19	7.97	13.84	8.32	6.32	7.85	3.77	5.52	2.61
	[Ni(en)2]2+		-15.67	-15.43	-17.93	-19.66	-19.11	-19.19	-16.3	-6.78	-7.73	-4.49	-6.94	-3.89	-11.51	-10.76	-13.08
	[Ni(form.)]2+		7.74	7.87	7.15	6.9	7.22	6.97	9.09	14.25	31.02	12.36	11.82	12.51	10.59	11.26	11.06
	[Ni(form.)2]2+		8	6.67	4.83	5.08	5.28	5.14	7.35	11.8	27.77	12.61	11.59	12.61	9.77	10.32	11.82
	[Ni(form.)3]2+		6.69	5.29	4.65	3.58	4.35	3.87	6.54	12.47	15.27	18.88	16.15	18.85	11.84	12.41	11.53
	[Ni(form.)4]2+		0.54	-5.38	-6.01	-8.61	-7.54	-8.1	-4.99	1.71	5.2	8.4	5.68	9.14	0.97	1.64	-0.38
	[Ni(NC)]+		3.48	4.87	5.11	4.26	4.56	4.31	5.62	9.4	22.19	12.41	11.74	12.39	9.61	9.61	9.61
	[Ni(NC)2]		8.45	8.62	7.51	7.34	7.43	7.46	8.5	13.43	23.43	13.38	12.37	13.31	10.58	10.82	12.48
	[Ni(NC)3]−		1.99	3.86	3.11	1.25	1.93	1.58	3.69	10.11	13.56	16.37	14.52	17.3	10.02	9.52	10.9
	[Ni(NC)4]2−		-7.57	-7.61	-8.02	-11.25	-10.3	-10.81	-6.96	2.08	4.88	7.57	5.82	9.58	0.14	0.15	-2.22
	[Ni(NCS)]+		7.83	7.38	5.86	6.04	6.11	6.15	6.42	8.42	29.37	9.01	8.22	8.62	7.44	7.52	8.99
	[Ni(NCS)2]		7.23	7.02	5.55	5.59	5.66	5.67	6.39	10.74	24.22	10.42	9.55	10.12	8.07	8.23	10.1
	[Ni(H2O)(NH3)]2+		8.84	10.03	8.27	8.21	8.4	8.43	9.78	15.18	28.75	13.31	12.44	13.18	11.07	11.79	10.17
	[Ni(H2O)(NH3)2]2+		7.33	7.15	4	3.92	4.39	4.35	7.06	15.63	14.18	18.38	15.08	17.57	10.96	12.52	10.99
	[Ni(H2O)(SH2)]2+		9.33	8.67	6.71	7.06	7.45	7.24	9.38	14.78	30.45	14.35	12.61	13.73	10.75	12.2	10.92
	[Ni(H2O)(SH2)2]2+		4.65	4.53	2.19	1.61	2.1	2.03	5.1	13.22	12.79	17.01	13.77	16.55	9.31	10.8	9.42
	[Ni(H2O)2(NH3)]2+		10.56	10.23	6.8	6.71	7.11	7.2	9.7	17.6	16.83	21.09	17.71	20.18	13.61	15.14	12.94
	[Ni(H2O)2(NH3)2]2+-cis		4.07	2.53	0.2	-1.65	-0.88	-1.05	1.75	9.64	10.4	13.53	11.07	14.06	6.7	7.47	4.77
	[Ni(H2O)2(NH3)2]2+-trans		1.61	0.21	-2.35	-4.49	-3.71	-3.88	-0.78	7.72	8.33	11.43	9.01	12.24	4.35	5.19	2.57
	[Ni(H2O)2(SH2)]2+		8.96	3.97	5.25	5.21	5.59	5.69	8.28	15.65	15.04	19.43	15.94	18.42	11.88	13.59	11.12
	[Ni(NH3)(SH2)]2+		7.75	9.87	8.68	8.36	8.49	8.34	9.25	12.88	25.98	11.74	11.6	11.99	10.72	10.71	9.51
	[Ni(NH3)(SH2)2]2+		4.49	5.49	4.21	2.39	3.12	2.83	5.6	13.91	13.23	16.2	14.08	16.9	9.88	10.63	8.33
	[Ni(NH3)2(SH2)]2+		-6.1	-7.62	-11.24	-9.28	-9	-9.18	-5.5	3.19	2.19	6.27	1.55	3.81	-2.68	0.4	-2.79
	[Ni(NH3)3(SH2)]2+		-3.29	-4.41	-5.94	-8.31	-7.28	-7.81	-4.39	5.02	4.69	7.66	5.41	8.7	0.69	1.52	-1.69
	[Ni(CH3)]+		-1.89	0.09	0.08	-0.16	0.35	-0.07			14.7
	[Ni(CH3)2]		-11.37	-11.63	-13.18	-13.54	-12.71	-13.22	-9.72	-0.47	-2.07	2.23	-1.06	2.01	-5.77	-4.08	-5.37
	[Ni(CO)]2+		12.69	12.8	11.21	11.24	11.55	11.4	14.08	20.26	41.64	17.71	16.48	17.35	14.86	16.58	14.7
	[Ni(CO)2]2+		9.08	10.06	8.81	8.54	8.86	8.73	11.39	17.3	34.08	15.88	14.77	15.75	12.94	14.27	12.9
	[Ni(CO)3]2+		-1.76	-0.48	-0.32	-3.12	-2.24	-2.84	3.57	13.69	16	19.39	17.28	21.21	10.82	12.15	9.59
	[Ni(CO)4]2+		-19.19	-17.81	-16.68	-20.6	-19.67	-20.3	-14.16	-3.63	-2.93	-0.77	-1.78	2.32	-8.03	-6.87	-8.88
	[Ni(CO)5]2+		-14.84	-11.74	-9.73	-16.36	-15.5	-16.08	-8.97	2.92	8.23	9.12	9.63	14.81	1.58	0.67	2.3
	[Ni(CO)6]2+		11.74	12.08	10.46	10.07	10.23	10.22	12.26	18.14	48.86	15.97	15.09	15.98	13.5	14.51	14.05
	[Ni(H2O)]2+		14.15	13.7	11.74	11.94	12.16	12.09	13.64	19.8	43.76	16.9	15.65	16.42	14.27	15.48	15.5
	[Ni(H2O)2]2+		12.61	12.26	10.08	10.07	10.24	10.27	11.31	16.81	36.23	15.3	14.32	15.04	12.92	13.36	15.79
	[Ni(H2O)3]2+		10.46	11.08	8.88	8.5	8.82	8.83	9.6	13.32	26.17	12.61	11.94	12.67	10.75	11.18	10.15
	[Ni(H2O)4]2+		12.85	10.75	7.1	6.85	7.32	7.32	10.39	18.27	17.32	21.54	18.03	20.62	13.93	15.99	12.31
	[Ni(H2O)5]2+		13.86	13.12	10.88	10.87	11.11	11.07	13.58	19.62	36.16	16.96	15.68	16.63	14.06	15.88	13.57
	[Ni(H2O)6]2+		16.03	15.82	13.71	13.87	14.04	14.04	16.25	22.08	60.61	18.82	17.7	18.37	16.43	18.1	17.16
	[Ni(NH2)]+		6.56	6.39	4.94	5.12	5.14	6.49	5.33	7.33	26.29	5.17	5.01	4.89	5.15	5.44	5.76
	[Ni(NH2)2]		2.18	2.19	-0.03	-0.1	0.11	0.12	2.12	6.88	8.82	12.62	9.7	11.95	6.01	6.71	6.01
	[Ni(NH3)]2+		8.61	9.07	7.51	7.6	7.92	7.78	10.16	16.29	31.27	14.69	13.33	14.35	11.45	12.88	10.82
	[Ni(NH3)(NH2)]+		6.99	6.73	4.99	5.56	5.72	6.68	6.39	8.98	25.18	7.29	6.99	7.22	6.62	6.95	7.19
	[Ni(NH3)2]2+		5.77	7.95	6.42	6.03	6.05	6.24	6.87	11.21	23.26	9.01	8.67	9.15	7.77	7.96	6.72
	[Ni(NH3)2(NH2)]+		6.45	7.13	5.81	4.8	5.55	5	6.92	12.3	12.33	14.11	12.84	14.69	10.08	10.42	8.87
	[Ni(NH3)3]2+		6.91	7.36	4.74	4.29	4.86	4.71	7.13	15.21	13.93	17.62	14.77	17.16	10.91	12.11	10.21
	[Ni(NH3)4]2+		-4.43	-5.64	-7.69	-9.99	-8.9	-9.41	-5.9	3.54	3.12	6.12	3.77	7.08	-0.92	0.07	-3.04
	[Ni(NH3)5]2+		10.74	10.65	7.18	6.7	7.15	7.11	10.77	19.94	17.87	21.96	18.73	21.39	14.39	16.5	13.47
	[Ni(NH3)6]2+		14.06	14.05	11.93	12.06	12.22	12.22	14.29	19.99	53.72	16.99	15.84	16.55	14.54	16.13	14.92
	[Ni(OH)]+		9.9	9.55	7.75	7.8	7.86	8.57	8.02	11.44	29.39	9.8	9.38	9.59	8.96	8.87	10.22
	[Ni(OH)(H2O)]+		10.72	9.88	7.99	8.25	8.42	7.89	8.93	13.18	31.86	11.75	10.96	11.43	10.06	10.27	12.71
	[Ni(OH)(H2O)2]+		10.14	9.87	7.84	7.72	7.87	7.92	8.73	13.42	22.93	11.53	10.78	11.41	9.72	10.15	11.32
	[Ni(OH)(H2O)3]+		3.04	4.31	0.82	-1.62	-1.24	-0.97	0.04	6.71	7.42	8.99	7.88	10.27	4.61	4.01	3.29
	[Ni(OH)2]		10.27	12.93	11.52	10.73	10.73	9.56	10.2	13.92	41.62	12.47	12.64	12.92	12.08	10.86	13.66
	[Ni(OH)3]−		8.88	8.71	5.14	4.71	5.24	5.25	4.24	8.04	11.63	14.54	12.22	14.07	9.43	7.95	15.24
	[Ni(OH)4]2−		-1.78	-0.77	-3.62	-6.02	-5.4	-5.27	-4.27	2.2	5.44	7.98	6.08	8.99	1.89	1.12	-0.17
	[Ni(PH2)]+		1.16	-3.05	-2.1	-1.68	-1.25	-1.58	1.53	7.18	14.96	15.85	12.59	15.33	7.47	8.04	8.78
	[Ni(PH2)2]		-16.26	-14.15	-14.13	-15.84	-15.06	-15.51	-13.52	-7.74	-8.59	-6.7	-7.9	-5.58	-10.99	-10.56	-11.68
	[Ni(PH2)3]−		-12.14	-10.87	-11.02	-12.54	-11.99	-12.36	-10.88	-6.18	-5.78	-3.81	-5.17	-3.1	-8.02	-7.92	-8.58
	[Ni(PH3)]2+		5.75	6.39	5.24	5.31	5.64	5.45	8.04	13.53	27.54	13.79	12.32	13.5	10.11	11.33	9.91
	[Ni(PH3)(PH2)]+		-7.94	-8.78	-7.45	-9.07	-8.05	-8.81			8.12
	[Ni(PH3)2]2+		9.87	12.04	11.09	11.11	11.06	11.14	11.49	15.25	27.88	12.36	12.31	12.3	12.01	12.14	11.78
	[Ni(PH3)2(PH2)]+		-10.01	-10.01	-10.31	-11.08	-10.29	-10.92	-8.7	-4.13	-2.68	0.03	-1.94	0.37	-5.45	-4.85	-5.36
	[Ni(PH3)3]2+		-5.66	-4.11	-3.6	-6.1	-5.2	-5.76	-2.71	5.36	4.91	7.25	5.79	8.75	1.54	2.05	0.38
	[Ni(PH3)4]2+		-20.59	-20.63	-17.97	-22.15	-20.72	-21.82	-18.43	-10.55	-10.33	-9.46	-9.68	-6.38	-13.91	-14.05	-17.68
	[Ni(PH3)5]2+		-23.89	-20.85	-16.35	-23.22	-22.02	-22.89	-19.55	-9.19	-6.16	-7.08	-5.26	-1.3	-10.76	-13.57	-12.01
	[Ni(SH)]+		6.78	6.73	5.52	5.63	5.69	5.76	6.4	9.46	38.1	6.22	6.05	6.09	5.95	6.82	4.23
	[Ni(SH)2]		5.17	2.25	-0.2	0.51	0.78	0.63	3.97	10.09	18.5	11.24	9.12	10.65	6.24	8.23	6.83
	[Ni(SH2)]2+		8.05	8.24	6.77	6.94	7.21	7.1	9.39	14.61	30.65	14.61	13.27	14.24	11.37	12.48	11.93
	[Ni(SH2)(SH)]+		9.07	9.03	7.95	6.7	7.5	7.02	10.29	18.58	18.67	21.56	19.54	22.3	15.12	15.9	15.22
	[Ni(SH2)2]2+		8.42	10.55	9.59	9.4	9.54	9.69	10.18	14.01	27.26	12.7	12.62	12.89	11.83	11.69	10.8
	[Ni(SH2)2(SH)]+		3.17	3.46	1.77	0.93	1.38	1.2	2.41	6.84	7.56	9.79	8.1	9.85	5.48	5.67	6.52
	[Ni(SH2)3]2+		3.48	4.04	2.73	1.1	1.67	1.52	4.83	13.94	13.59	17.36	14.62	17.78	9.73	10.77	9.92
	[Ni(SH2)4]2+		-3.29	-3.95	-4.19	-7.18	-6.15	-6.76	-3.04	6.29	6.34	8.92	7.19	10.64	2.24	2.77	-0.12
	[Ni(SH2)5]2+		3.83	4.87	4.14	0.75	1.22	1.23	5.01	15.83	16.23	18.84	17.27	20.79	11.8	11.84	10.62
	[Ni(SH2)6]2+		10.91	11.1	9.13	9.28	9.4	9.47	11.12	16.05	40.22	14.9	13.59	14.39	11.91	13.15	12.31
	[Ni(SH)3]−		3.03	4.34	2.73	1.59	2.08	1.95	3.45	9.21	9.55	12.36	10.32	12.62	6.96	7.26	7.51
	MAE			1.14289	2.22904	2.20036	1.91843	1.96494	1.64133	6.91157	15.1928	8.45193	7.00217	8.91988	4.01229	4.57747	3.83458

[truncated: 5 more sheets: S11 (DFT_Ni3), S12 and S13 (xtb), Dispersion, Geometries, Sheet1]
